# Supplementary material for: Origin of the polychromatic photoluminescence of zeolite confined Ag clusters: temperature- and co-cation-dependent luminescence
Source: Royal Society of Chemistry journal article supplement (doi:10.1039/d2sc03197c), 2022-01-01
Supplement: d2sc03197c1.pdf [file d2sc03197c1.pdf]

## Electronic Supplementary Information

### Origin of the polychromatic photoluminescence of zeolite confined Ag clusters: temperature- and co-cation- dependent luminescence

Li Sun,<sup>a</sup> Masoumeh Keshavarz,<sup>a</sup> Giacomo Romolini,<sup>a</sup> Bjorn Dieu,<sup>a</sup> Johan Hofkens,<sup>ac</sup>  
Flip de Jong,<sup>a</sup> Eduard Fron,<sup>ac\*</sup> Maarten B. J. Roeffaers,<sup>b\*</sup> Mark Van der Auweraer<sup>ac\*</sup>

<sup>a</sup> Chem&Tech – Molecular Imaging and Photonics, KU Leuven, Celestijnenlaan 200F, 3001 Leuven, Belgium

<sup>b</sup> Chem&Tech – Centre for Membrane Separations, Adsorption, Catalysis and Spectroscopy for Sustainable Solutions, KU Leuven, Celestijnenlaan 200F, 3001 Leuven, Belgium

<sup>c</sup> KU Leuven Core Facility for Advanced Spectroscopy, Celestijnenlaan 200F, 3001 Leuven, Belgium

\*corresponding authors:

eduard.fron@kuleuven.be,

maarten.roeffaers@kuleuven.be,

mark.vanderauweraer@kuleuven.be

#### Content:

1. Materials and synthesis
2. Characterization
  - 2.1 Emission/excitation spectra and photoluminescence quantum yield (PLQY)
  - 2.2 Diffuse reflection spectra (DRS)
  - 2.3 Thermogravimetric analysis
  - 2.4 Elemental analysis
  - 2.5 X-ray diffraction measurement
  - 2.6 Time-resolved spectroscopy
    - 2.6.1 Time-correlated single-photon counting (TCSPC)
    - 2.6.2 Nanosecond to millisecond time-resolved luminescence
3. Supplementary Figures, Tables and relevant text (Figure S1-S49 and Table S1-S3)
4. References

## 1. Materials and synthesis

In this study, commercial Na-LTA zeolites (UOP) were used as parent materials possessing a normalized and dehydrated unit cell (N.U.C.) with composition  $\text{Na}_{12}\text{Si}_{12}\text{Al}_{12}\text{O}_{48}$ . A series of mixed Li, Na and Ag cation-exchanged LTA were prepared according to the exchange procedure described in detail as reported.<sup>1</sup> Briefly, 3 g of LTA zeolite powder was suspended in 250 mL of an aqueous lithium nitrate solution (5.8 M,  $\text{LiNO}_3$  Sigma-Aldrich,  $\geq 99.99\%$ ), then the suspension was agitated in an end-over-end shaker at 60 °C over one week. During this procedure, the exchange solution was replaced 3 times with a fresh  $\text{LiNO}_3$  solution to complete full Li exchange. The Li-LTA sample was collected by filtration using a Büchner filter and washed several times with Milli-Q water. Afterward, a batch of zeolites with different Li and Na content was obtained via partly re-exchanging 250 mg of Li-LTA zeolite with  $\text{Na}^+$  overnight, using 100 mL of a sodium nitrate solution (1.65 to 19.84 mM,  $\text{NaNO}_3$  Sigma-Aldrich,  $\geq 99.99\%$ ). The theoretical chemical formula of the dehydrated zeolites is  $\text{Li}_x\text{Na}_{12-x}\text{Si}_{12}\text{Al}_{12}\text{O}_{48}$  ( $\text{Li}_x\text{Na}_{12-x}$ -LTA,  $x=0, 1, \dots, 12$ ). Subsequently, one  $\text{Na}^+$  in 200 mg of these  $\text{Li}_x\text{Na}_{12-x}$ -LTA zeolites were exchanged by one  $\text{Ag}^+$  using 100 mL of a silver nitrate solution (1.17 to 1.32 mM,  $\text{AgNO}_3$  Sigma-Aldrich,  $\geq 99.99\%$ ). Hence  $\text{Ag}_1$ -exchanged  $\text{Li}_x\text{Na}_{12-x}$ -LTA zeolite samples denoted as  $\text{Ag}_1\text{Li}_x\text{Na}_{11-x}$ -LTA ( $x=0, 1, \dots, 11$ ) were obtained. Finally, the Ag exchanged zeolites were activated overnight to form Ag clusters (AgCLs) in a muffle oven at 450 °C, starting from room temperature with a heating rate of 5 degrees per minute. In order to avoid zeolite framework destruction by too fast water removal, two 30 min intervals at 80 °C and 110 °C were set.<sup>2</sup> After heat-treatment, these samples were cooled to room temperature in an ambient atmosphere for hydration and then stored in the dark for further analysis.

To obtain dehydrated  $\text{Ag}_1\text{Li}_6\text{Na}_5$ -LTA, after the same calcination at 450 °C overnight, the sample was quickly transferred to a vial and kept heated at 450 °C for another 60 minutes. Afterwards, the vial was taken out of the oven and immediately sealed with a silica stopper. Upon cooling down, the sample was transferred to a quartz tube inside a glovebox and carefully sealed for the spectroscopic experiments.

Hydrated  $\text{Ag}_1\text{Li}_6\text{K}_5\text{-LTA}$  sample can be prepared by using potassium nitrate ( $\text{KNO}_3$ ) in a similar ion-exchange and heat-treatment procedure.

## **2. Characterization**

### **2.1 Emission/excitation spectra and photoluminescence quantum yield (PLQY)**

The steady-state luminescence properties, including two-dimensional (2D) excitation-emission plots and room-temperature (RT, 298 K) photoluminescence quantum yields (PLQYs), were recorded on an Edinburgh FLS980 fluorimeter with samples placed in a quartz tube (5 mm diameter) and a quartz cuvette (1 mm path length) respectively. 2D emission-excitation plots were also observed at liquid nitrogen temperature (LNT, 77 K). For an excitation wavelength of 265 nm more detailed temperature-dependent photoluminescence measurements (T-dependent PL) were also performed on this setup by connecting an external cryostat (Linkam Scientific Instrument system: T96-S) to the fluorimeter. Samples encapsulated between two quartz plates were placed inside the chamber of the temperature stage (HFS600) which was connected to a Dewar filled with liquid nitrogen and a temperature controller (LNPS96-S). At RT, the PLQY was measured at the maximum of the excitation spectra using an integrating sphere (Labsphere, 100 mm diameter) coupled to the aforementioned fluorimeter through optical fibers. At LNT, the PLQY was measured by coupling the integrating sphere to a Horiba Jobin Yvon Fluorolog fluorimeter. Barium sulfate was adopted as a fully scattering reference for the PLQY measurement.

### **2.2 Diffuse reflection spectra (DRS)**

The diffuse reflectance spectra (DRS) at RT/LNT were performed on a Horiba Jobin Yvon Fluorolog fluorimeter. Quartz tubes containing the samples were placed in a Dewar flask without/with liquid nitrogen. Barium sulfate and black carbon powders were used as 100% and 0% reflective references, respectively. The reflectance percentage of the DRS was finally transformed into Kubelka-Munk (K-M).

### **2.3 Thermogravimetric analysis**

Thermogravimetric analysis (TGA) was implemented on a TA Instruments Q500 thermogravimetric analyzer to monitor the water loss behavior of hydrated samples after dehydration. The zeolite samples (15-25 mg) were heated under nitrogen gas flow (90 mL/min) until 700 °C with a linear heating ramp of 10°C/min. TA Universal Analysis software was used for analysis.

### **2.4 Elemental analysis**

The elemental analysis of different zeolite samples was conducted by inductively coupled plasma-optical emission spectrometry (ICP-OES) and atomic absorption spectroscopy (AAS), aiming to figure out Ag content and Li/Na composition respectively. ICP-OES was performed using a Varian 720-ES instrument and AAS using a Varian SpectrAA 20 plus. After analysis of the weight percentage (wt%), the element content was determined by normalizing the combined charge of all cations (Ag=1, Li+Na=11) to 12.

### **2.5 X-ray diffraction measurement**

X-ray diffraction (XRD) measurements were performed on a Malvern PANalytical Empyrean diffractometer using Cu K $\alpha$ 1 radiation ( $\lambda=1.5406$  Å).

### **2.6 Time-resolved spectroscopy**

#### **2.6.1 Time-correlated single-photon counting (TCSPC)**

Time-correlated single-photon counting (TCSPC) was used to determine the luminescence decays at the pico-nanosecond time scale. Samples were enclosed in sealed quartz tubes for the experiments at 298 K and 77 K. The frequency-tripled output (266 nm, 8.18 MHz, 2 ps FWHM) of a mode-locked Ti: Sapphire laser (Tsunami, Spectra Physics) was chosen as the excitation source. The linearly polarized excitation light was rotated to a vertical direction by using a Berek compensator (New Focus) in combination with a polarizer and directed onto the sample. The emission was collected under 90° with respect to direction of the incident light and guided through a polarizer that was set at the magic angle (54.7°) with respect to the polarization of the excitation

beam. The fluorescence was spectrally resolved by a monochromator (Sciencetech 9030, 100 mm focal length, wavelength accuracy 0.3 nm), and detected by a microchannel plate photomultiplier tube (MCP-PMT, R3809U-51, Hamamatsu). A time-correlated single photon timing PC module (SPC 830, Becker & Hickl) was used to obtain the fluorescence decay histogram in 4096 channels. The decays were recorded with 10000 counts in the peak channel, in a time window of 26 ns corresponding to 6.34 ps per channel. A time-resolved fluorescence analysis (TRFA) software based on iterative reconvolution of the data with the instrumental response function (IRF) was applied to analyze these decays. The full width at half- maximum (FWHM) of the IRF was typically in the order of 42 ps. The quality of the fits was judged by the fit parameters  $\chi^2$  ( $<1.2$ ),  $Z^2$  ( $<3$ ) and the Durbin Watson parameter ( $1.8 < DW < 2.2$ ) as well as by the visual inspection of the residuals and their autocorrelation function.

### **2.6.2 Nanosecond to millisecond time-resolved luminescence**

Zeolite samples were encapsulated between two quartz plates and filled in quartz tubes for measurement of temperature-dependent time-resolved luminescence by using the Linkam Scientific Instrument system (T96-S) as mentioned before for temperature control. They were excited using laser pulses generated by a Nd: YAG laser (Quanta-Ray INDI-40, Spectra Physics, 355 nm) pumping an optical parametric oscillator (OPO, basisScan/120, GWU-Lasertechnik). The excitation light was set to 265 nm by doubling the output of the OPO (530 nm) using a home-made doubler and wavelength separator to suppress the residual light. The obtained excitation light was focused on the sample using a lens (focal length  $\sim 300$  mm). A fraction of the excitation light was sent to a fast photodiode for generating an electronic trigger. The emitted luminescence was collected at a right-angle configuration, filtered with a long-pass filter (360 nm) and focused on the entrance slit of a spectrograph with a focal length of 300 mm (SpectroPro-300i, Acton Research). A photomultiplier tube (PMT) (Hamamatsu, R928) mounted at one exit port of the spectrograph was used as detector. The width of the entrance and exit slits of the spectrograph were set to 0.5 mm. The electrical signal was sent to an oscilloscope with a 50-Ohm entrance to obtain the transient electrical

signal. The time resolution of the experiment was estimated to 10 ns using scattered light. A homemade software based on LabView was used to control and trigger the instruments, and to read, average and store the data. The time windows used here were 200  $\mu$ s and 2 ms.

### 3. Supplementary Figures, Tables and relevant text

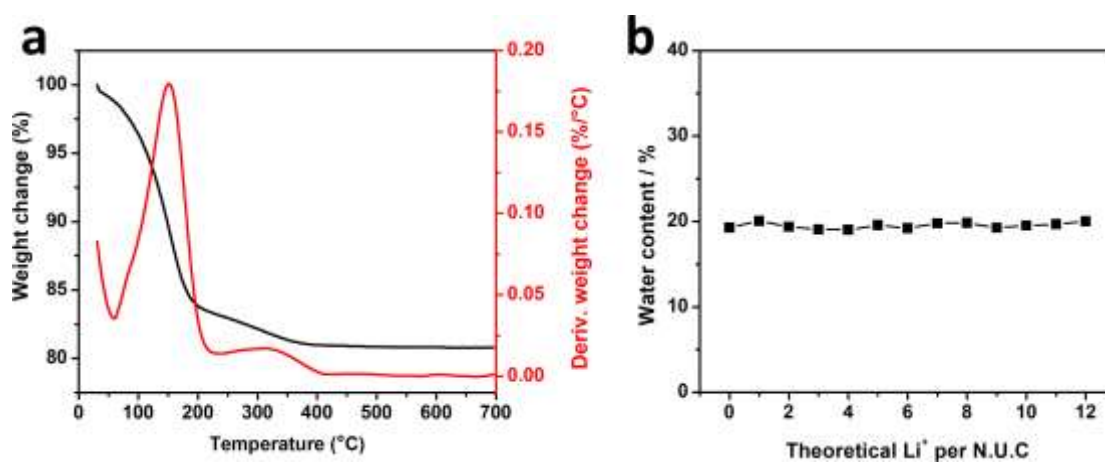

**Figure S1.** (a) Thermogravimetric analysis (TGA) of a hydrated  $\text{Ag}_1\text{Li}_6\text{Na}_5$ -LTA sample and (b) the water content of all  $\text{Ag}_1$ -exchanged  $\text{Li}_x\text{Na}_{12-x}$ -LTA ( $x=0-12$ ) zeolites. The latter plot shows that they all have a similar hydration level with a water content around 20 wt%.

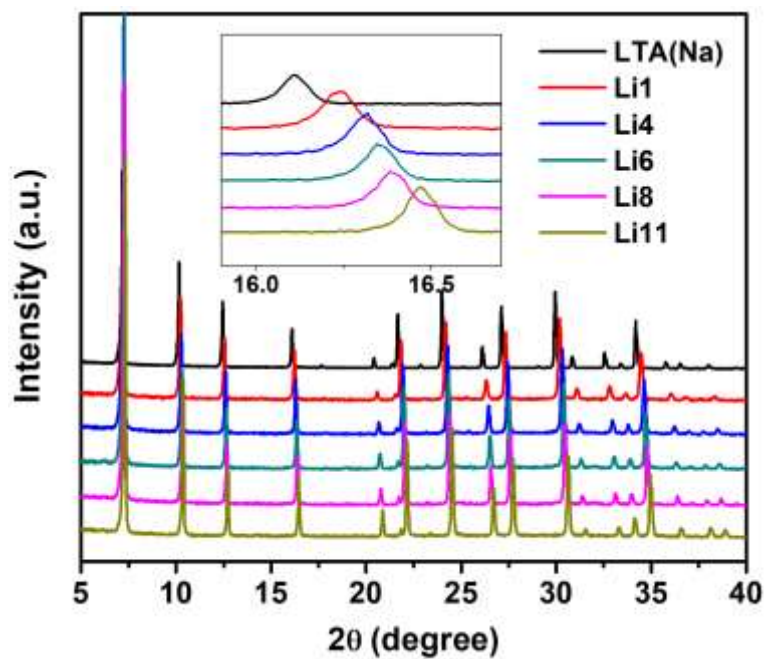

**Figure S2.** X-ray diffraction (XRD) of neat LTA (Na) and Ag<sub>1</sub>-exchanged Li<sub>x</sub>Na<sub>12-x</sub>-LTA (x=1, 4, 6, 8, 11) samples at 298 K.

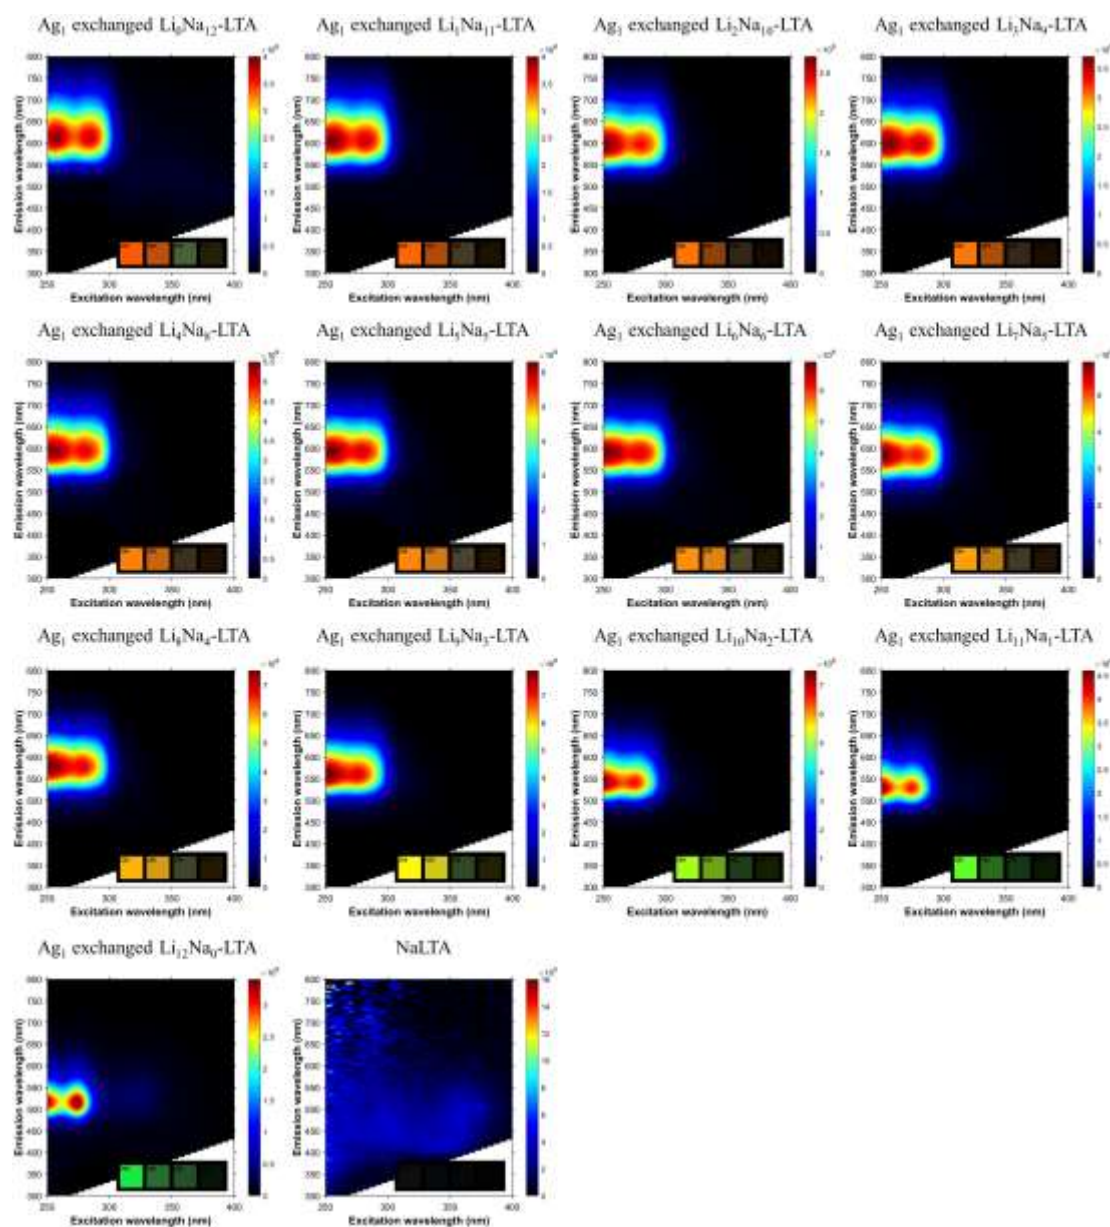

**Figure S3.** Two-dimensional excitation/emission plots of the hydrated  $\text{AgI}$ -exchanged  $\text{Li}_x\text{Na}_{12-x}\text{-LTA}$  ( $x=0-12$ ) samples and a neat NaLTA zeolite sample at 298 K.



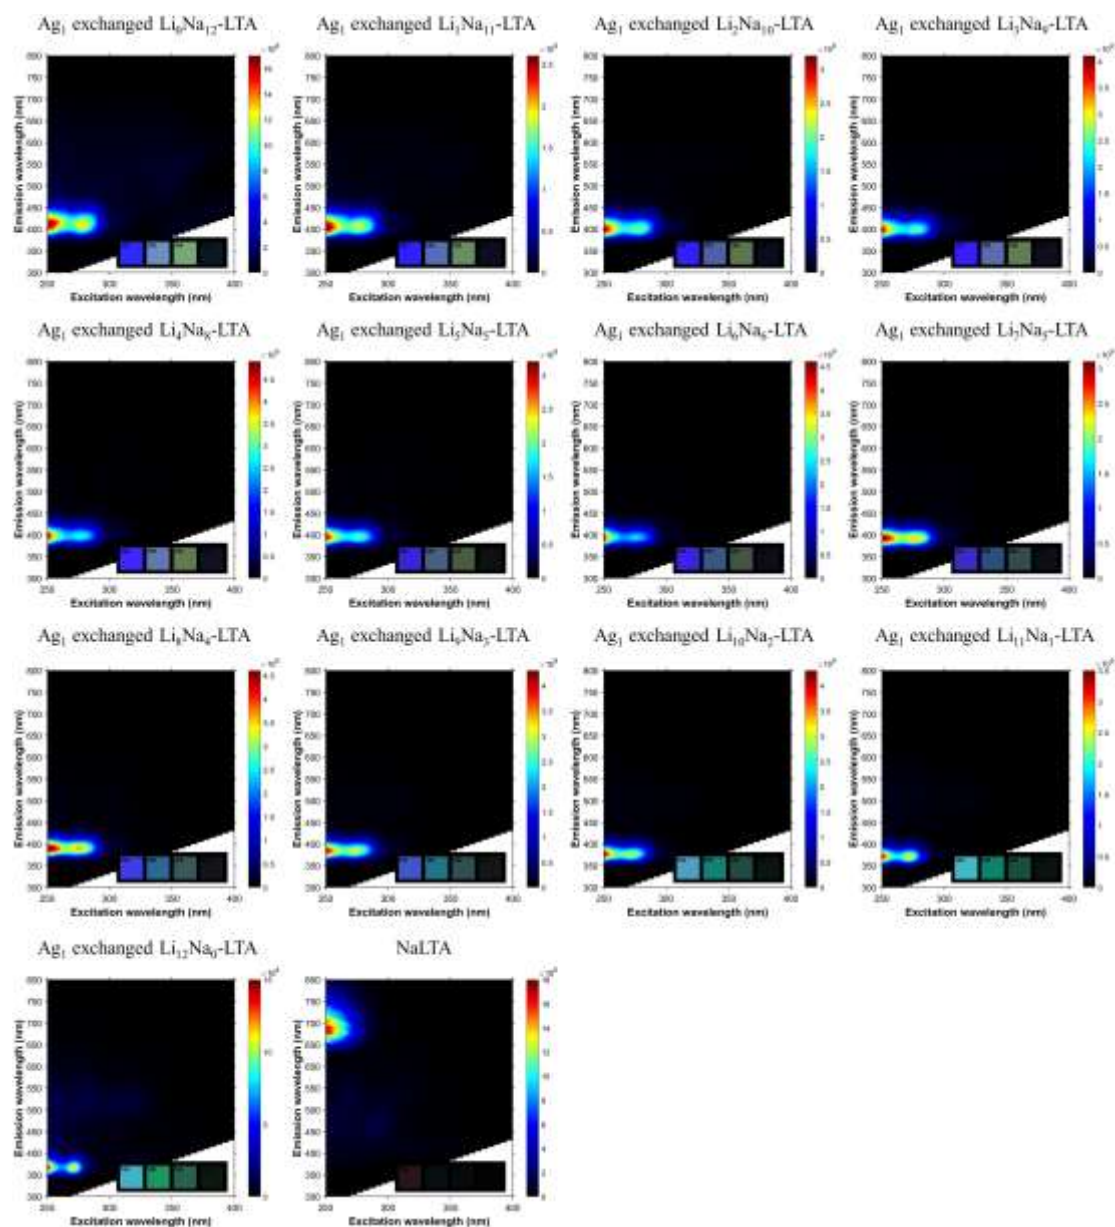

**Figure S4.** Two-dimensional excitation/emission plots of the hydrated Ag<sub>I</sub>-exchanged Li<sub>x</sub>Na<sub>12-x</sub>-LTA (x=0-12) samples and a neat NaLTA zeolite sample at 77 K.

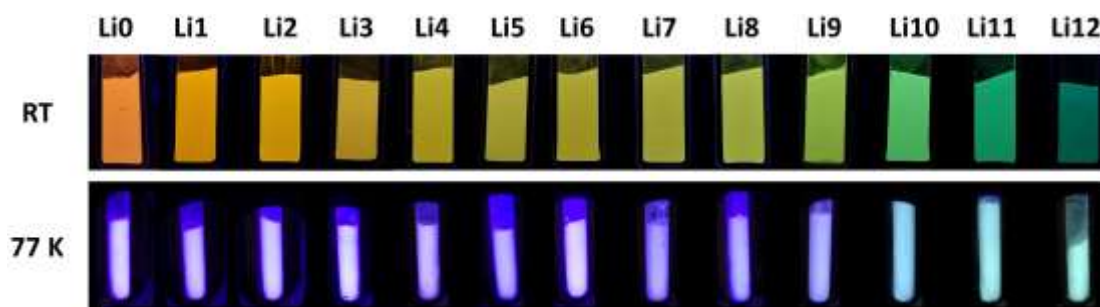

**Figure S5.** Images of the luminescent  $\text{Ag}_1$ -exchanged  $\text{Li}_x\text{Na}_{12-x}$ -LTA ( $x=0-12$ ) zeolites (simply denoted as  $\text{Li}_x$ ;  $x=0-12$ ) at 298 K (RT) and 77 K under a UV lamp (ex255 nm). The emission color varies from orange to blue upon increasing the Li content at RT, while it doesn't change significantly at 77 K. Note that the violet is missing from  $\text{Li}_{10}$  to  $\text{Li}_{12}$  at 77 K, this is because their maximum emissions ( $<380$  nm) are beyond the visible light range.

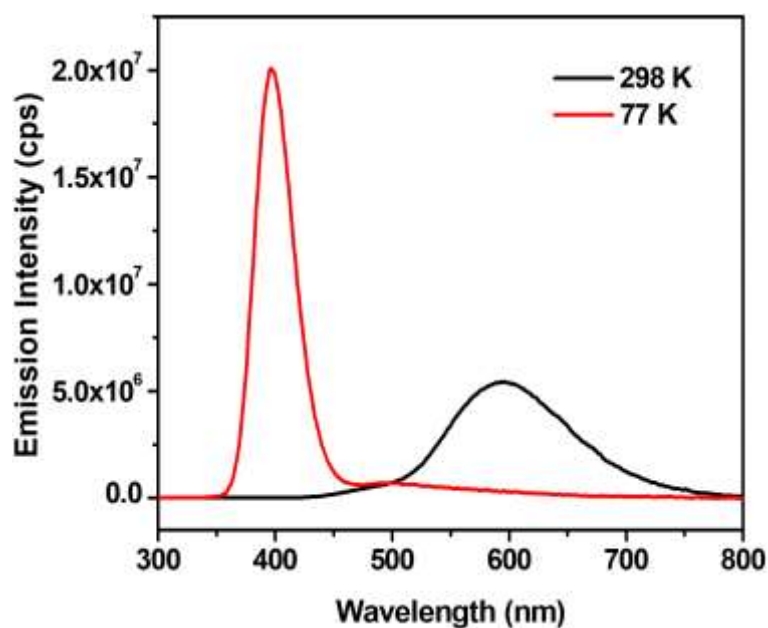

**Figure S6.** The emission spectra of  $\text{Ag}_1\text{Li}_6\text{Na}_5$ -LTA at 298 K and 77 K under 265 nm excitation.

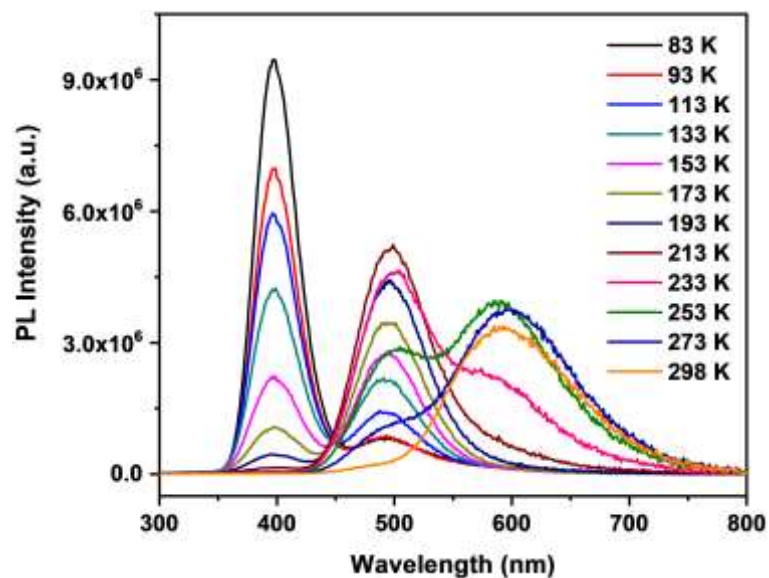

**Figure S7.** Temperature-dependent photoluminescence spectra of  $\text{Ag}_1\text{Li}_6\text{Na}_5\text{-LTA}$  with temperature increasing from 83 K to 298 K under 265 nm excitation. This change has been shown to be reversible.

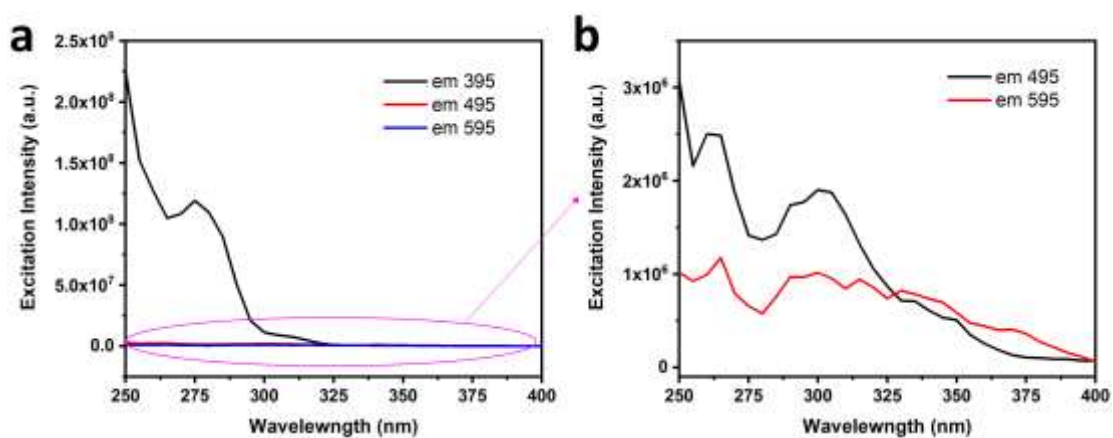

**Figure S8.** The excitation spectra of  $\text{Ag}_1\text{Li}_6\text{Na}_5\text{-LTA}$  at 77 K (detected at 395 nm, 495 nm and 595 nm).

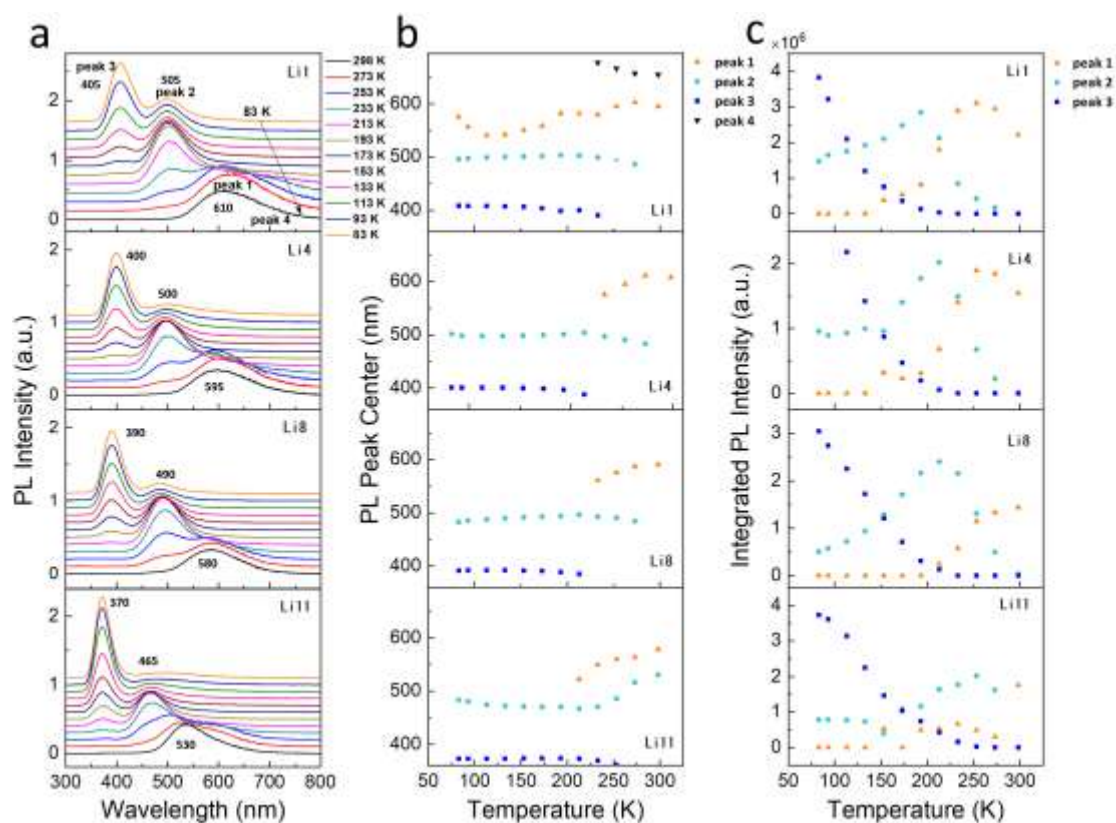

**Figure S9.** (a) Temperature-dependent photoluminescence spectra of Ag<sub>1</sub>-exchanged Li<sub>x</sub>Na<sub>12-x</sub>-LTA (x=1, 4, 8, 11) zeolites for temperature ranging from 298 K to 83 K under 265 nm excitation; the peaks that appear sequentially as the temperature decreases are named peak 1, peak 2, and peak 3 (peak 4 was only observed for Ag<sub>1</sub>Li<sub>1</sub>Na<sub>10</sub>-LTA: ~700 nm). (b) Peak position and (c) integrated peak intensity at different temperatures. Figure S8c as well as Figure 1f show the integrated PL intensity of the different peaks as a function of temperature. This integrated intensity was determined through Gauss fits to the PL spectra.

## Photoluminescence investigation of dehydrated $\text{Ag}_1\text{Li}_6\text{Na}_5\text{-LTA}$ sample at RT and 77 K

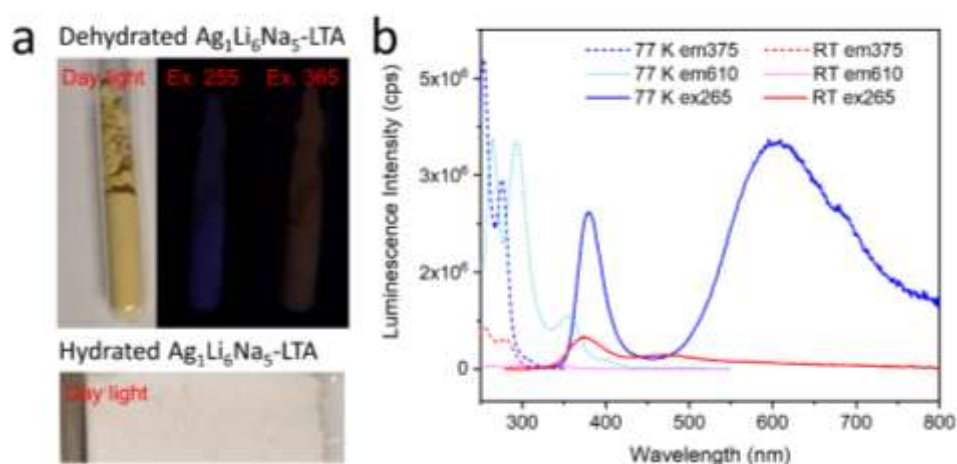

**Figure S10.** (a) The photographs of (de)hydrated  $\text{Ag}_1\text{Li}_6\text{Na}_5\text{-LTA}$  under daylight and/or a UV-lamp (excitation wavelength: 255 and 365 nm) at RT; (b) The excitation and emission spectra of dehydrated  $\text{Ag}_1\text{Li}_6\text{Na}_5\text{-LTA}$  sample measured at RT and 77 K respectively.

In order to explore the role of water molecules incorporated in the zeolite the spectroscopy of the silver clusters in a hydrated and dehydrated sample of  $\text{Ag}_1\text{Li}_6\text{Na}_5\text{-LTA}$  were compared.

The dehydrated sample was obtained by calcination at 450 °C overnight. The sample was then quickly transferred to a vial and kept heated at 450 °C for another 60 minutes. Afterwards, the vial was taken out of the oven and immediately sealed with a silica stopper. Upon cooling down, the sample was transferred to a quartz tube inside a glovebox and carefully sealed for the spectroscopic experiments.

At RT, the dehydrated  $\text{Ag}_1\text{Li}_6\text{Na}_5\text{-LTA}$  shows a yellow color under daylight (Figure S10) which is different from the hydrated sample which is a white powder. This behavior is analogous to what was earlier reported for  $\text{Ag}_3\text{Na}_9\text{LTA}$ .<sup>3</sup> This indicates the strong coordination of AgCLs with  $\text{O}_F$  (framework oxygens) upon the loss of water, leading to the deactivation of the luminescent AgCLs to AgCLs with weak/no luminescence. In the hydrated state, the water ligands play a role as protecting shell of the clusters blocking the coordination with LTA framework oxygens, resulting in the

intense luminescence as shown in the manuscript. For the dehydrated  $\text{Ag}_1\text{Li}_6\text{Na}_5\text{-LTA}$  we can observe a weak luminescence at RT with a maximum at 375 nm. This weak 375 nm emission has excitation maxima around 255 and 275 nm (the same as the excitation maxima of the hydrated sample). At 77 K, the intensity of the emission with the maximum at 375 nm increased significantly and a second even more intense band with maximum at 610 nm was observed. For both bands the maximum of the excitation spectrum remained between 255 and 275 nm. The 610 nm emission at 77 K could be attributed to the formation of  $\text{Ag}_6$  clusters in dehydrated LTA zeolite of which the intensity increased at 77 K.<sup>3</sup> The behavior of the dehydrated sample resembles strongly that of the dehydrated sample of  $\text{Ag}_3\text{Na}_9\text{LTA}$  discussed previously.<sup>3</sup>

## The role of the counter ions on the photoluminescence

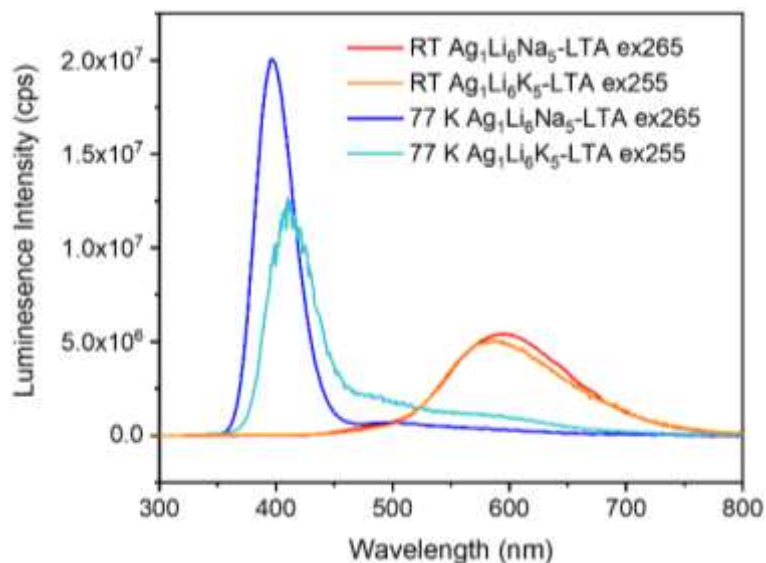

**Figure S11.** Emission spectra of hydrated Ag<sub>1</sub>Li<sub>6</sub>K<sub>5</sub>-LTA (excitation at 255) and hydrated Ag<sub>1</sub>Li<sub>6</sub>Na<sub>5</sub>-LTA (excitation at 265 nm) at RT and 77 K.

At RT the emission maximum (excitation 255 nm) is situated at 585 nm which is 10 nm shorter than observed for Ag<sub>1</sub>Li<sub>6</sub>Na<sub>5</sub>-LTA. In analogy with Ag<sub>1</sub>Li<sub>6</sub>Na<sub>5</sub>-LTA, a blue shift of the maximum to 410 nm is observed upon cooling the sample to 77 K. This is 10 nm longer than observed for Ag<sub>1</sub>Li<sub>6</sub>Na<sub>5</sub>-LTA at 77 K (Figure S11). However in contrast to Ag<sub>1</sub>Li<sub>6</sub>Na<sub>5</sub>-LTA, the emission spectrum of Ag<sub>1</sub>Li<sub>6</sub>K<sub>5</sub>-LTA shows at 77 K also a small shoulder between 450 and 550 nm. In an analogy to our data the presence of two different bands (one around 410 and one around 450-550 nm) at 77 K suggests the presence of several excited state species related to different minima in the potential energy surface of the excited state. The difference between the 77 K spectra of Ag<sub>1</sub>Li<sub>6</sub>K<sub>5</sub>-LTA and Ag<sub>1</sub>Li<sub>6</sub>Na<sub>5</sub>-LTA also suggests a faster relaxation to T<sub>1</sub>, i.e. a smaller energy barrier separating T<sub>3</sub>, T<sub>2</sub> and T<sub>1</sub>.

The similar behavior of the spectra of Ag<sub>1</sub>Li<sub>6</sub>K<sub>5</sub>-LTA and Ag<sub>1</sub>Li<sub>6</sub>Na<sub>5</sub>-LTA strongly suggests that also the Ag<sub>1</sub>Li<sub>6</sub>K<sub>5</sub>-LTA sample will be characterized by the same temperature-dependent polychromatic photoluminescence as described in our manuscript.



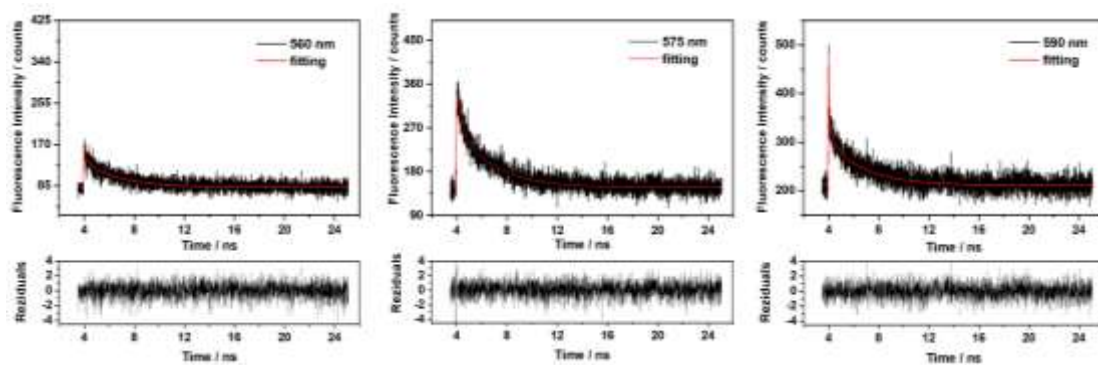

**Figure S12.** Luminescence decay traces obtained by the time-correlated single-photon counting (TCSPC) and the corresponding fittings as a bi-exponential decay for  $\text{AgLi}_6\text{Na}_5\text{-LTA}$ , at 298 K in a 26-ns time window ( $\lambda_{\text{ex}}=318$  nm,  $\lambda_{\text{det}}=545\text{-}635$  nm). The recovered decay times amount to 0.33 ns and 2.97 ns.

As discussed in the main text, the 2.97 ns component responsible for the major part of the ps-ns emission at 298 K, has a maximum around 580 nm. In spite of the features of its AWD resembling the stationary emission spectrum at 298 K, it is however not straightforward to attribute this component to fluorescence of the singlet excited state 1 ( $S_1$ ). In this case the internal conversion from  $S_3$  over  $S_2$  to  $S_1$  would occur at 298 K on picosecond time scale, which is four or more orders of magnitude faster than the analogous conversion from  $T_3$  over  $T_2$  to  $T_1$  at 298 K (see main text). An alternative and more likely approach is the attribution of the 2.97 ns component at 580 nm to a small population of clusters differing in nuclearity, geometry or coordination with the LTA lattice and/or water molecules from the AgCL responsible for the stationary emission in this wavelength range.



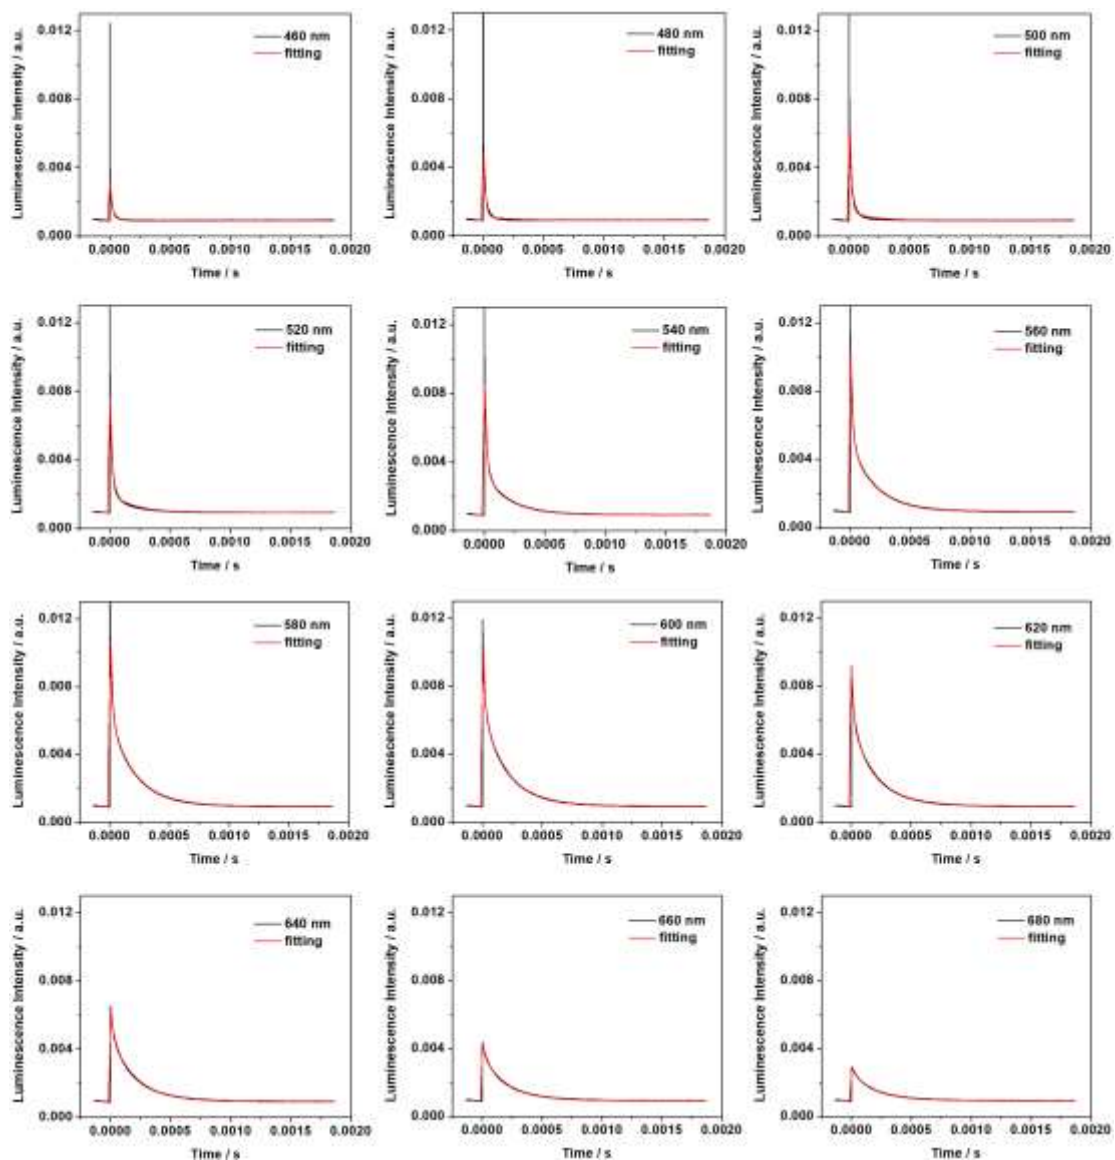

**Figure S13.** Luminescence decay traces obtained by the ns-ms time-resolved luminescence technique and the corresponding fittings to a multi-exponential decay for  $\text{Ag}_1\text{Li}_6\text{Na}_5\text{-LTA}$ , at 298 K in a 2-ms time window ( $\lambda_{\text{ex}}=265$  nm,  $\lambda_{\text{det}}=400\text{-}760$  nm).

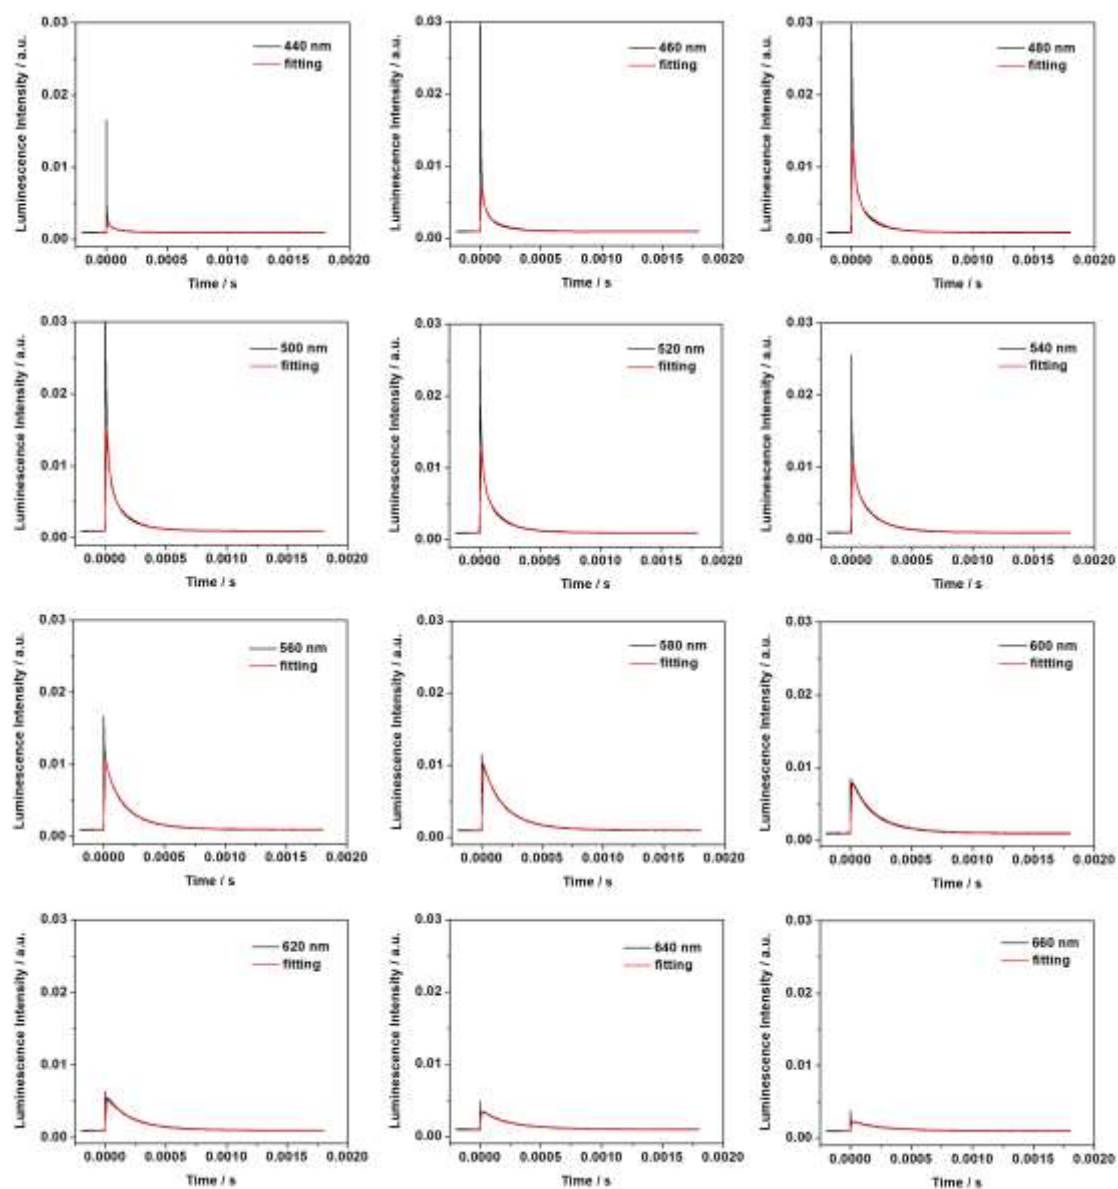

**Figure S14.** Luminescence decay traces obtained by the ns-ms time-resolved luminescence technique and the corresponding fittings to a multi-exponential decay for  $\text{Ag}_1\text{Li}_6\text{Na}_5\text{-LTA}$ , at 253 K in a 2-ms time window ( $\lambda_{\text{ex}}=265$  nm,  $\lambda_{\text{det}}=440\text{-}720$  nm).

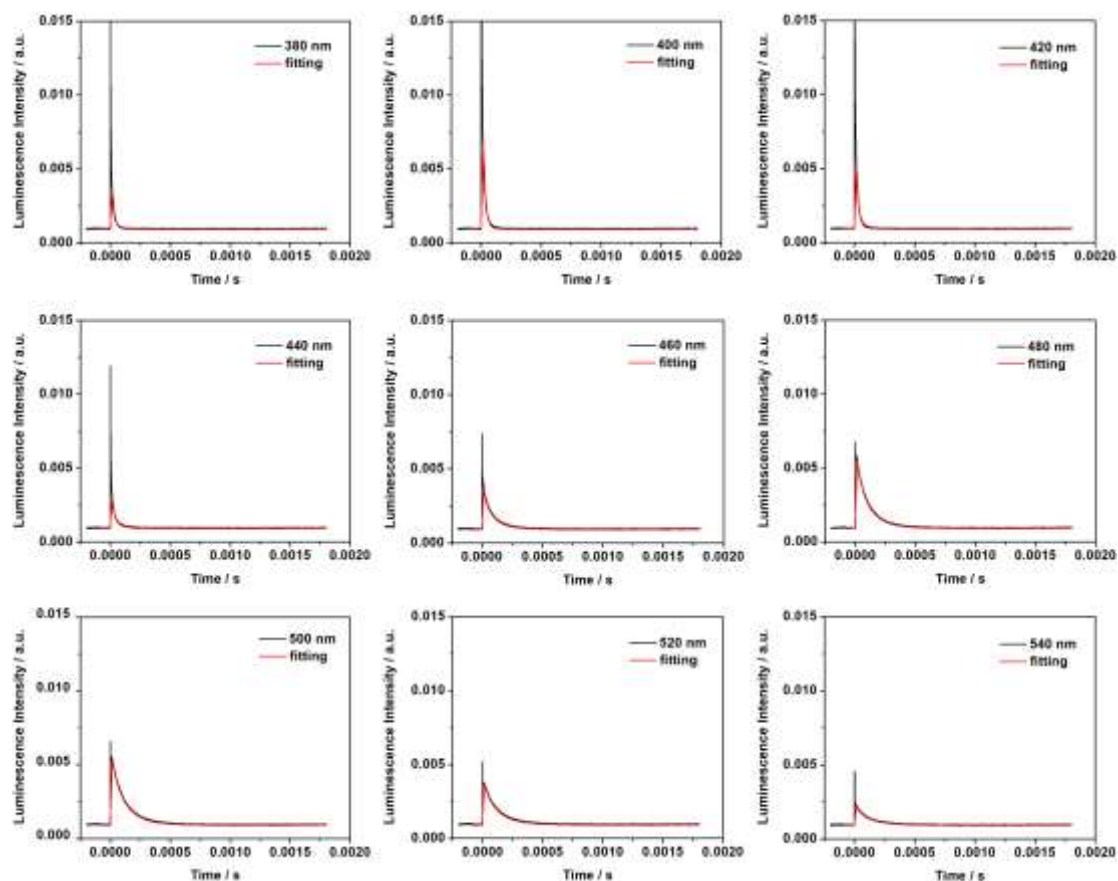

**Figure S15.** Luminescence decay traces obtained by the ns-ms time-resolved luminescence technique and the corresponding fittings to a multi-exponential decay for  $\text{Ag}_1\text{Li}_6\text{Na}_5\text{-LTA}$ , at 153 K in a 2-ms time window ( $\lambda_{\text{ex}}=265$  nm,  $\lambda_{\text{det}}=380\text{-}580$  nm).

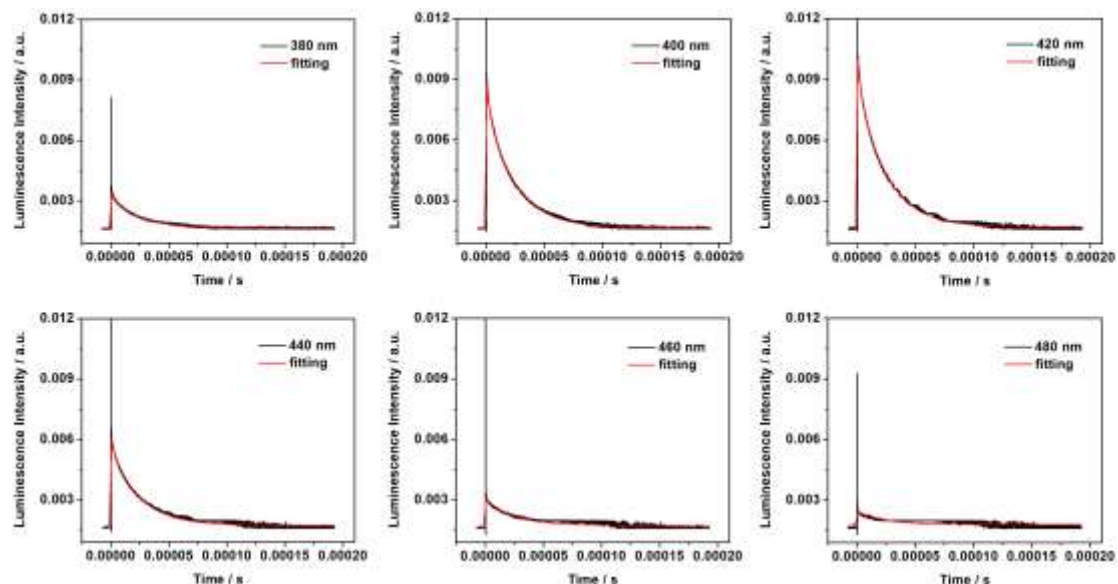

**Figure S16.** Luminescence decay traces obtained by the ns-ms time-resolved luminescence technique and the corresponding fittings to a multi-exponential decay for  $\text{Ag}_1\text{Li}_6\text{Na}_5\text{-LTA}$ , at 77 K in a 200- $\mu\text{s}$  time window ( $\lambda_{\text{ex}}=265$  nm,  $\lambda_{\text{det}}=380\text{-}480$  nm).

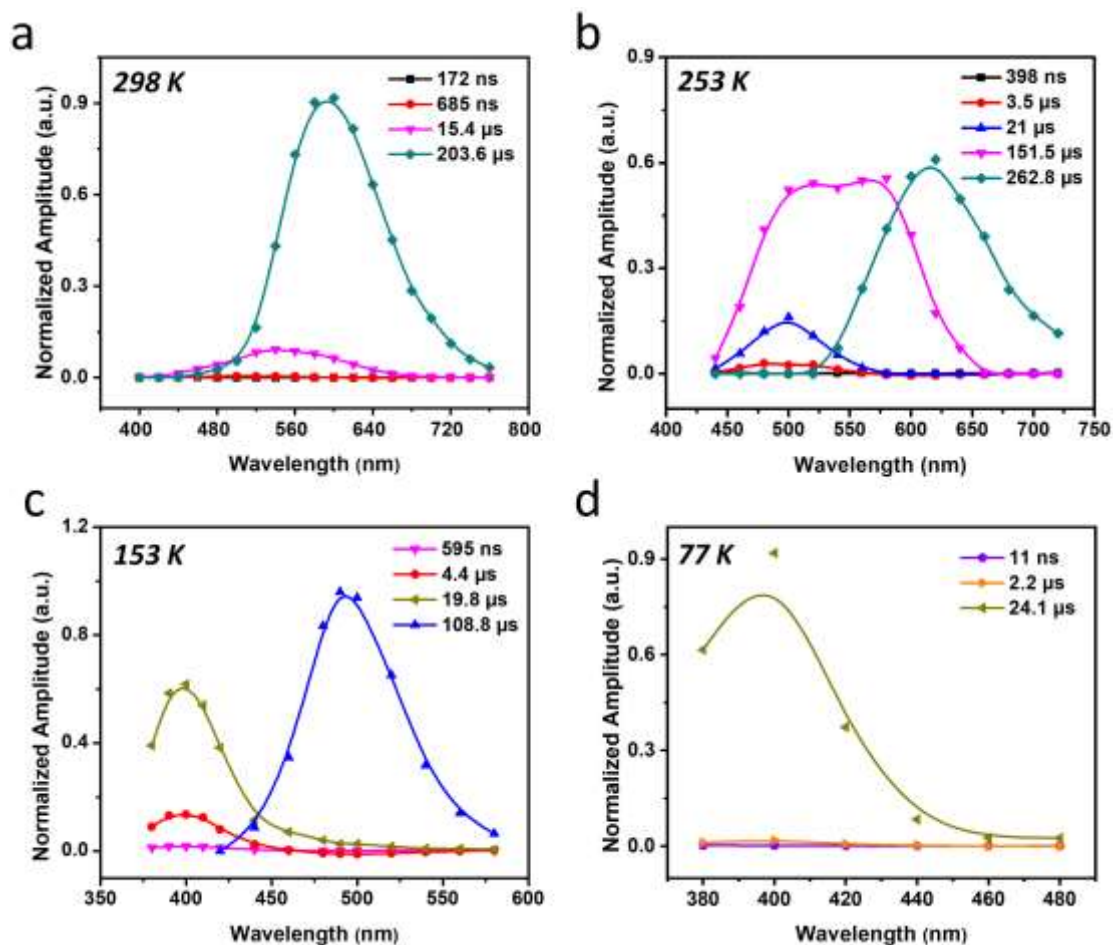

**Figure S17.** The decay associated spectra (DAS) obtained by the ns-ms time-resolved luminescence technique for  $\text{Ag}_1\text{Li}_6\text{Na}_5\text{-LTA}$  at (a) 298 K, (b) 253 K, (c) 153 K and (d) 77 K in a 2-ms and 200- $\mu\text{s}$  time window ( $\lambda_{\text{ex}}=265$  nm,  $\lambda_{\text{det}}=380\text{-}760$  nm).

For the components with a decay time of 172 ns (298 K), 398 ns (253 K) and 595 ns (153 K), one should note that they all contribute much less than 1% to the total emission intensity. As the total PLQY at 77 K amounts to 0.73 and as 95% of this emission is due to the species with a decay time of 24.1  $\mu\text{s}$  at least 69% of the absorbed photons populate this species. If the intrinsic PLQY of this species is less than one even a larger fraction of the absorbed photons are channeled to this species. This means that at best a minor fraction of the absorbed photons is channeled to the species with decay times ranging from 172 ns at 298 K to 595 ns at 153 K which were tentatively attributed to an impurity or to clusters with a slightly different structure and low abundance.

## Explanation of the negative amplitude at wavelength longer than 600 nm.

The general function used in the fit analysis is a multi-exponential decay function with the form:

$$I(t) = \sum_{i=1}^n A_i \exp\left(-\frac{t}{\tau_i}\right)$$

where  $A_i$  is the amplitude or pre-exponential factor and  $\tau(t)$  is the time constant. When a time resolved luminescence signal displays a rising part due to fact that the emitting species is generated by decay of a precursor, the fit analysis detects this rise as a decay component with a negative amplitude. This suggests that the emission attributed to that state is first being formed with a time constant  $\tau(i)$  and a corresponding amplitude  $A_i$ . In a very simplistic manner, the scheme bellow indicates the luminescence signal expected when  $T_1$  is formed with 685 ns time constant from  $T_2$  while  $T_1$  decays with a time constant 203.5  $\mu$ s. The time profile observed for  $T_1$  corresponds to that expected for the intermediate in case of two consecutive first order reactions.

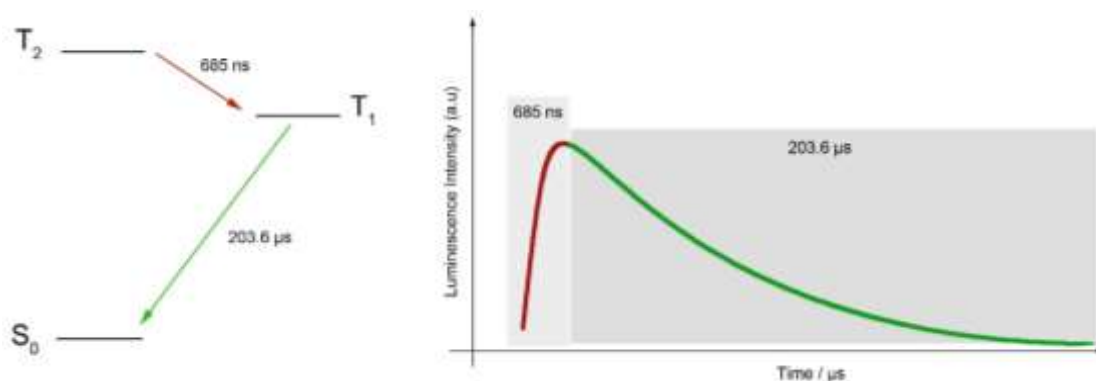

**Figure S18.** Kinetic scheme and related time-dependent luminescence signal for a process with negative amplitude of the pre-exponential factor.

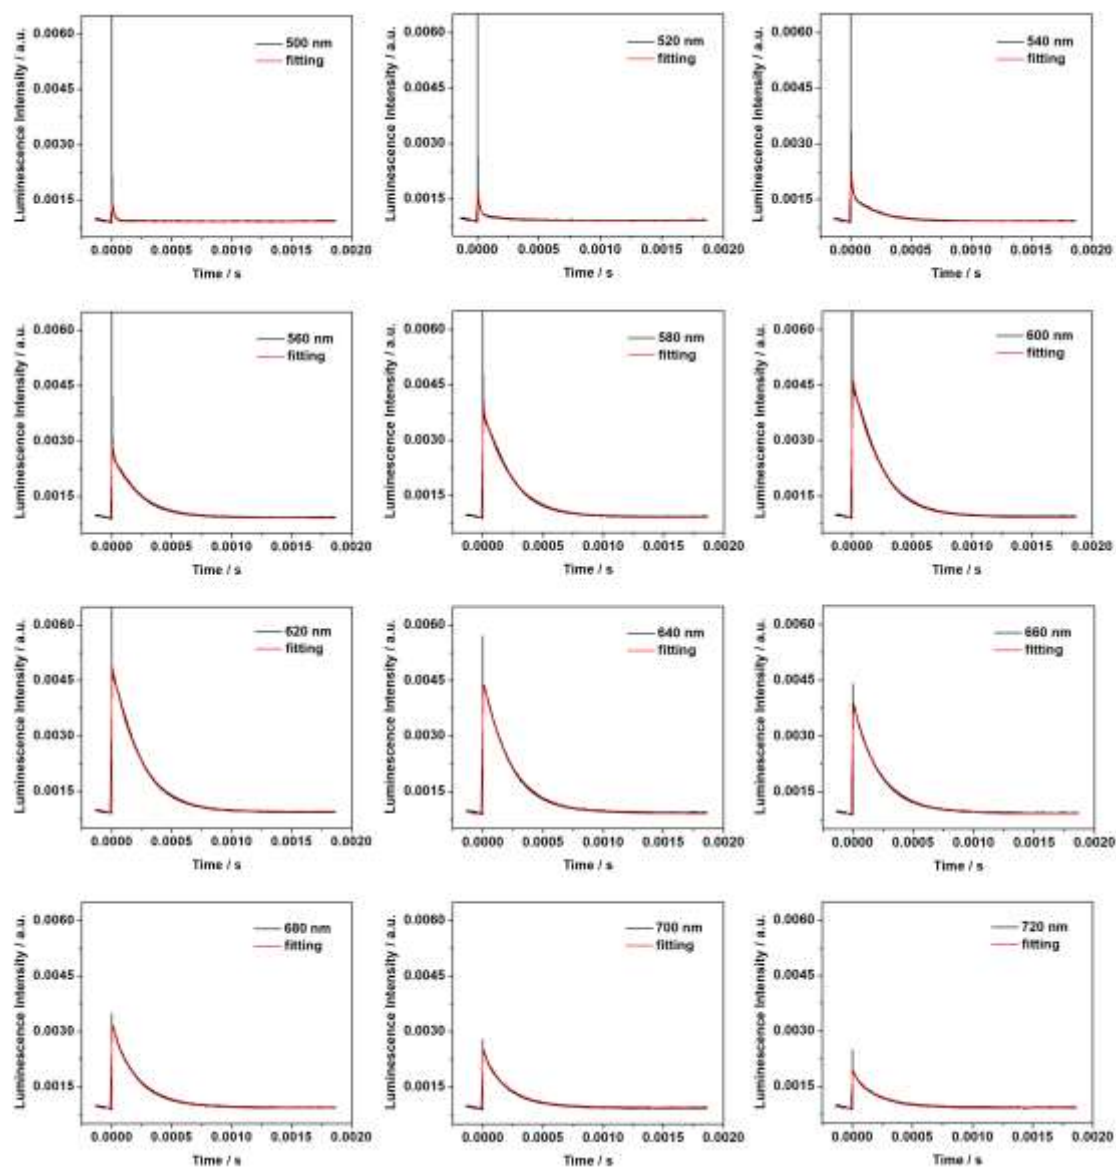

**Figure S19.** Luminescence decay traces obtained by the ns-ms time-resolved luminescence technique and the corresponding fittings to a multi-exponential decay for  $\text{Ag}_1\text{Li}_0\text{Na}_{11}\text{-LTA}$ , at 298 K in a 2-ms time window ( $\lambda_{\text{ex}}=265$  nm,  $\lambda_{\text{det}}=500\text{-}720$  nm).



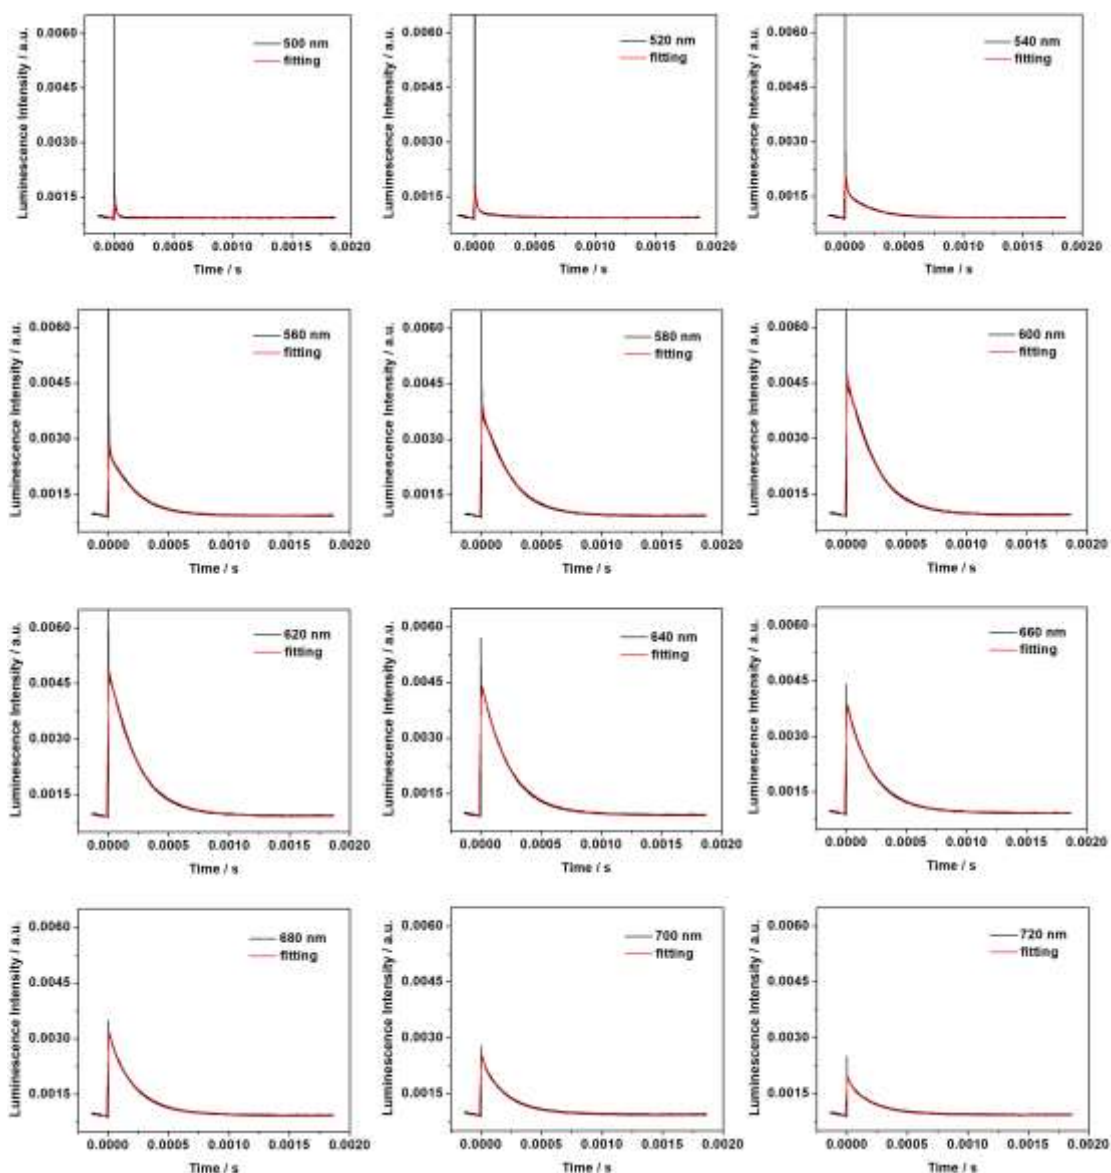

**Figure S20.** Luminescence decay traces obtained by the ns-ms time-resolved luminescence technique and the corresponding fittings to a multi-exponential decay for  $\text{Ag}_1\text{Li}_1\text{Na}_{10}\text{-LTA}$ , at 298 K in a 2-ms time window ( $\lambda_{\text{ex}}=265$  nm,  $\lambda_{\text{det}}=500\text{-}720$  nm).

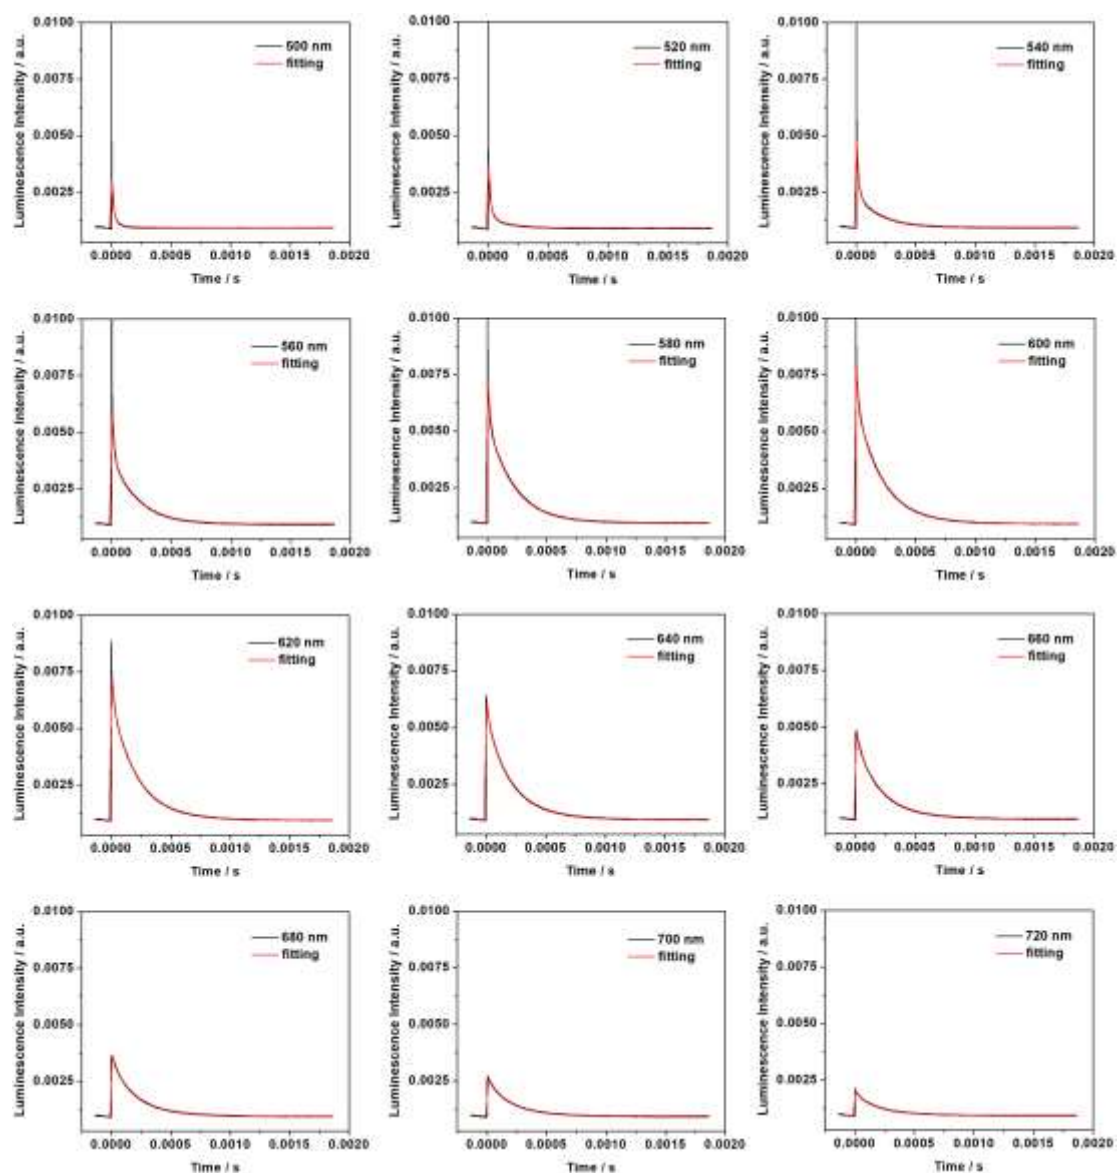

**Figure S21.** Luminescence decay traces obtained by the ns-ms time-resolved luminescence technique and the corresponding fittings to a multi-exponential decay for  $\text{Ag}_1\text{Li}_2\text{Na}_9\text{-LTA}$ , at 298 K in a 2-ms time window ( $\lambda_{\text{ex}}=265$  nm,  $\lambda_{\text{det}}=500\text{-}720$  nm).



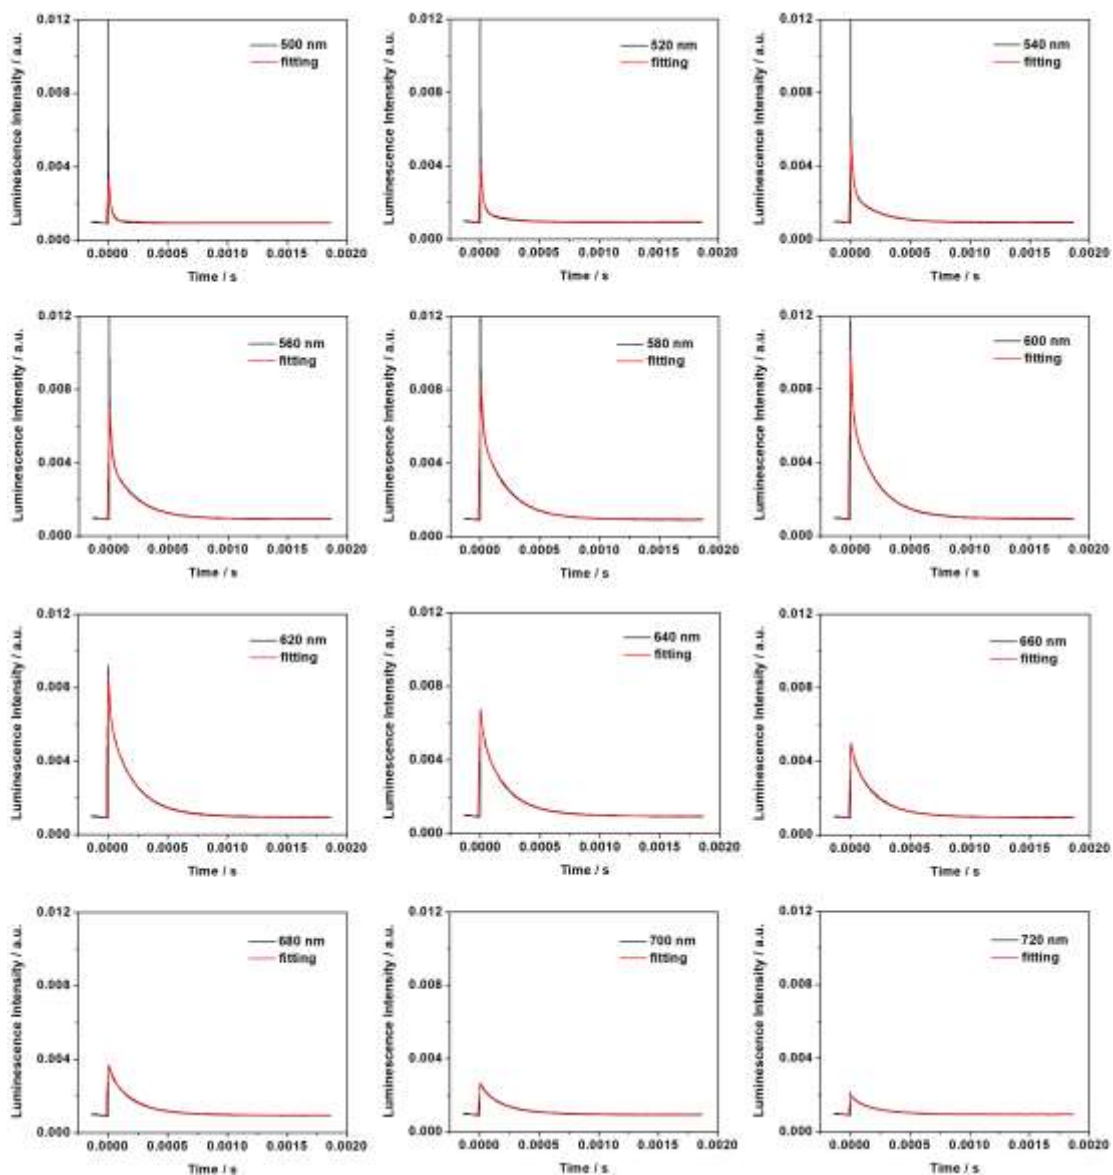

**Figure S22.** Luminescence decay traces and obtained by the ns-ms time-resolved luminescence technique the corresponding fittings to a multi-exponential decay for Ag<sub>1</sub>Li<sub>3</sub>Na<sub>8</sub>-LTA, at 298 K in a 2-ms time window ( $\lambda_{\text{ex}}=265$  nm,  $\lambda_{\text{det}}=500-720$  nm).

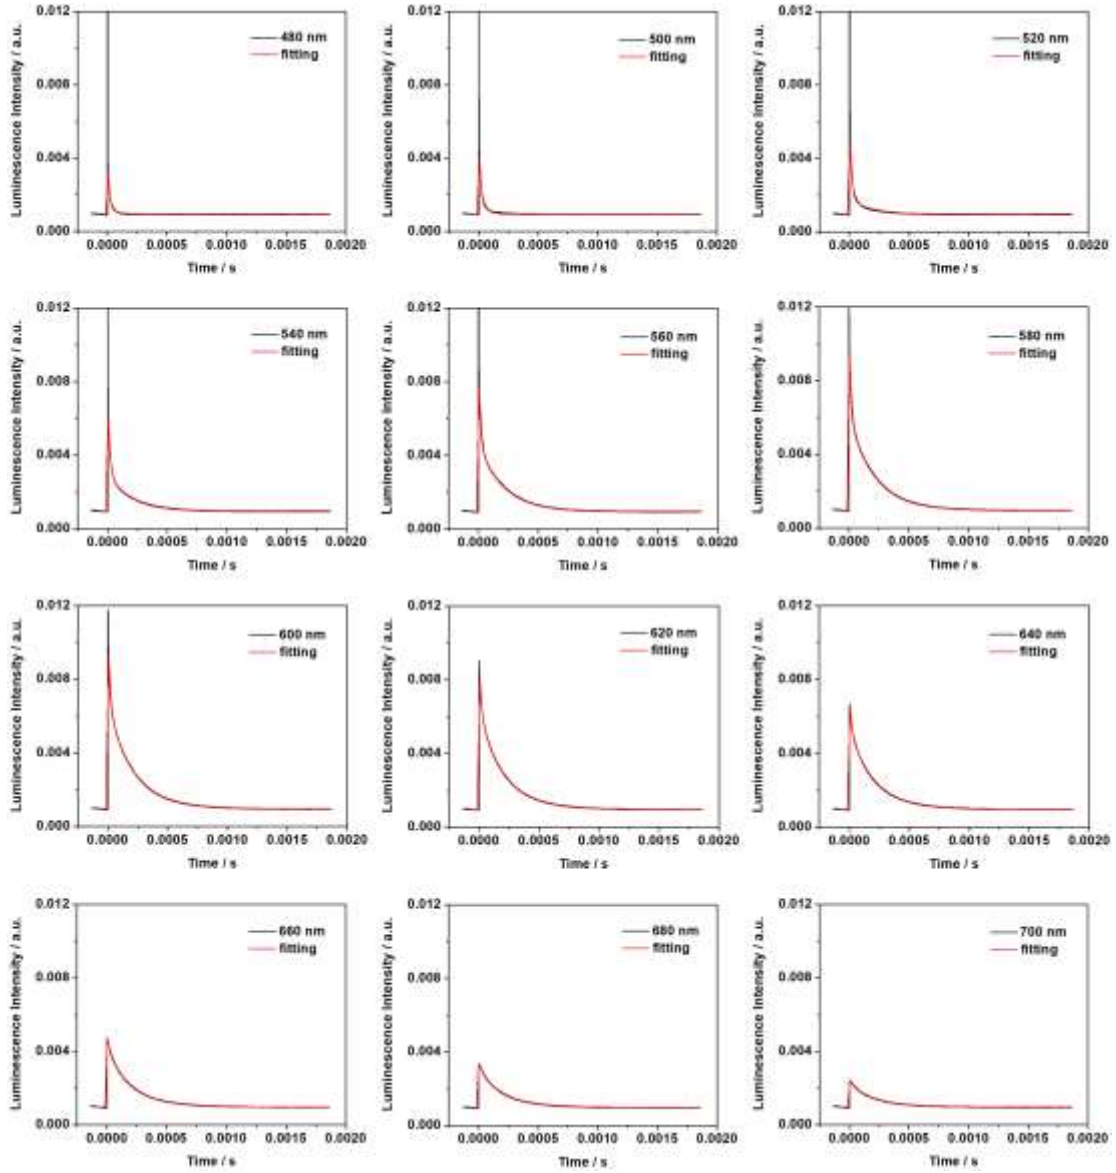

**Figure S23.** Luminescence decay traces obtained by the ns-ms time-resolved luminescence technique and the corresponding fittings to a multi-exponential decay for  $\text{Ag}_1\text{Li}_4\text{Na}_7\text{-LTA}$ , at 298 K in a 2-ms time window ( $\lambda_{\text{ex}}=265$  nm,  $\lambda_{\text{det}}=480\text{-}700$  nm).

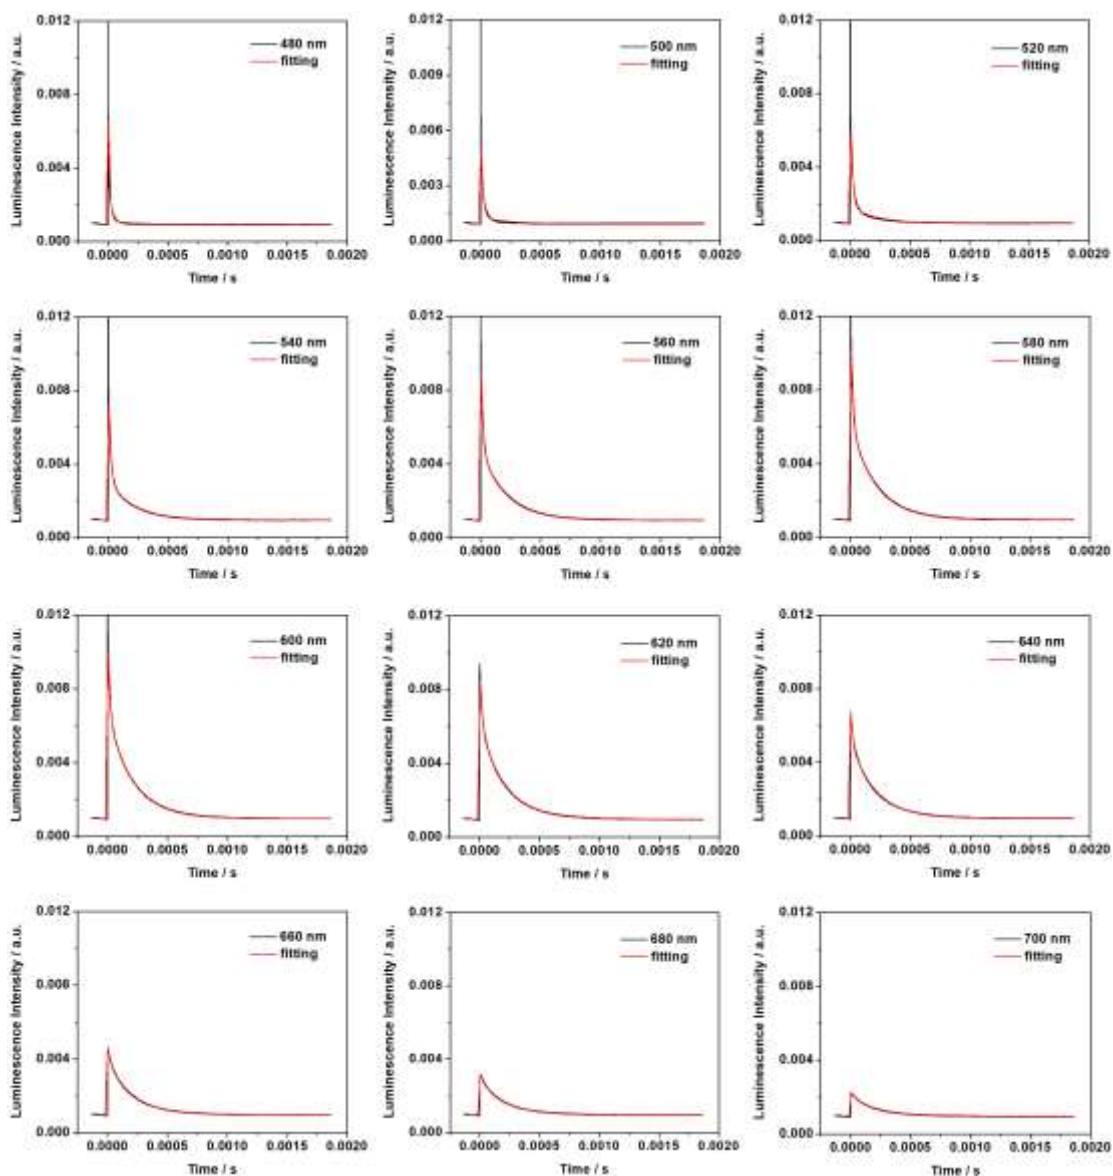

**Figure S24.** Luminescence decay traces obtained by the ns-ms time-resolved luminescence technique and the corresponding fittings to a multi-exponential decay for  $\text{Ag}_1\text{Li}_5\text{Na}_6\text{-LTA}$ , at 298 K in a 2-ms time window ( $\lambda_{\text{ex}}=265$  nm,  $\lambda_{\text{det}}=480\text{-}700$  nm).

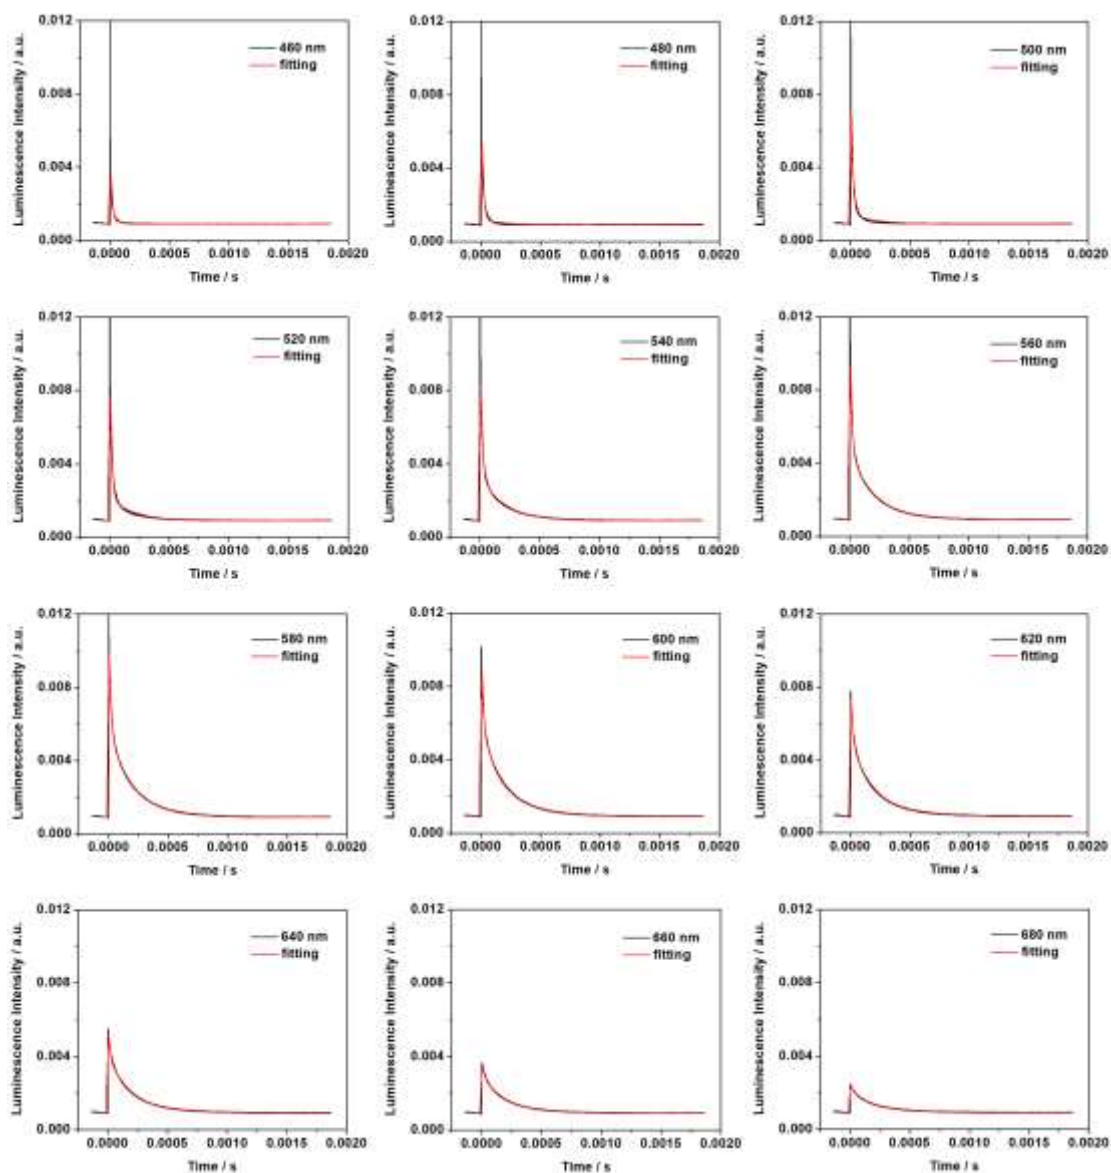

**Figure S25.** Luminescence decay traces obtained by the ns-ms time-resolved luminescence technique and the corresponding fittings to a multi-exponential decay for  $\text{Ag}_1\text{Li}_7\text{Na}_4\text{-LTA}$ , at 298 K in a 2-ms time window ( $\lambda_{\text{ex}}=265$  nm,  $\lambda_{\text{det}}=460\text{-}680$  nm).

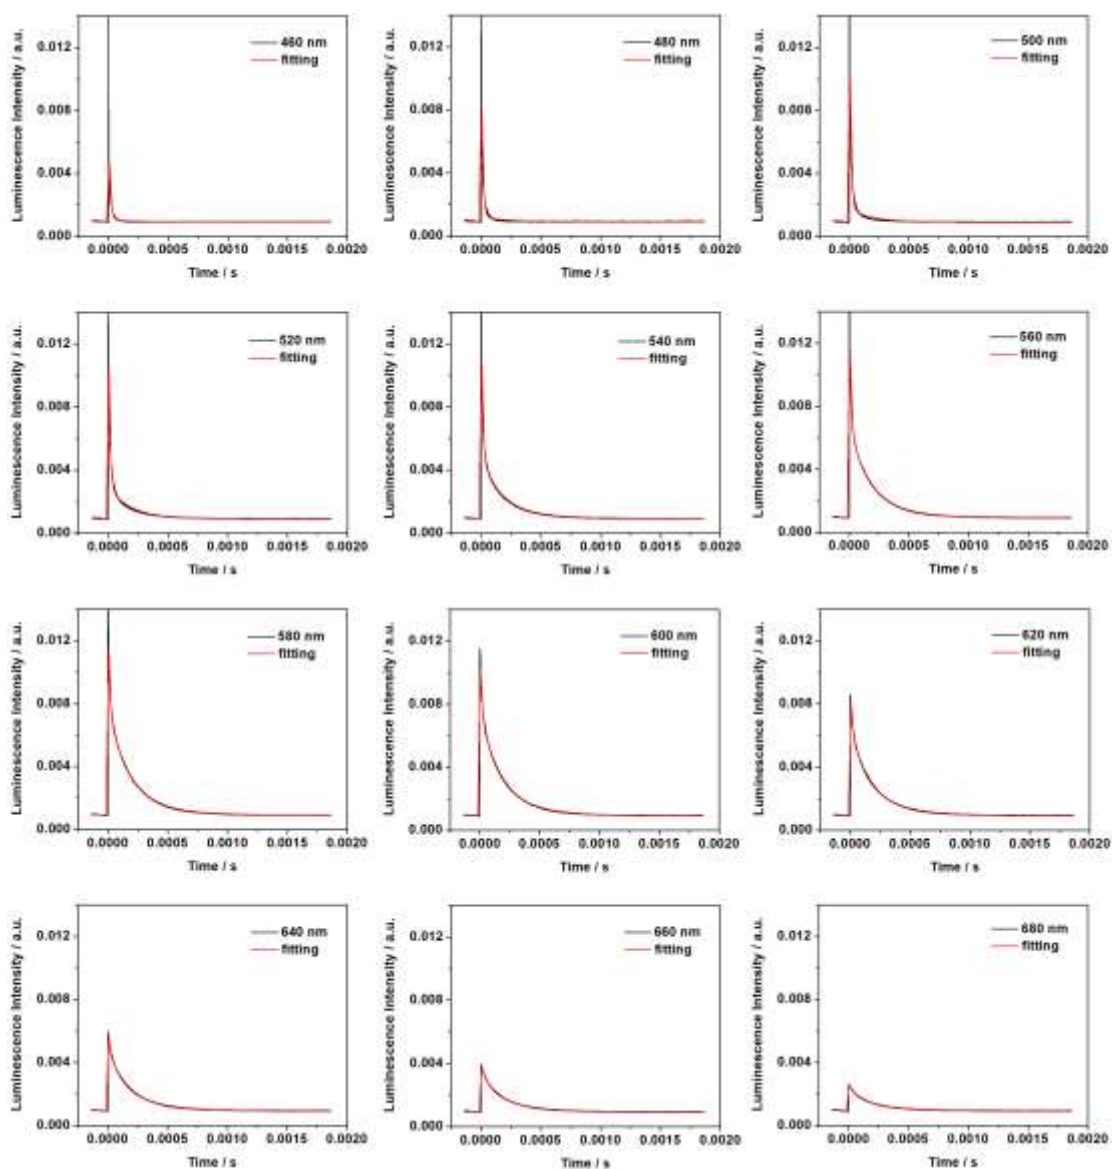

**Figure S26.** Luminescence decay traces obtained by the ns-ms time-resolved luminescence technique and the corresponding fittings to a multi-exponential decay for  $\text{Ag}_1\text{Li}_8\text{Na}_3\text{-LTA}$ , at 298 K in a 2-ms time window ( $\lambda_{\text{ex}}=265$  nm,  $\lambda_{\text{det}}=460\text{-}680$  nm).

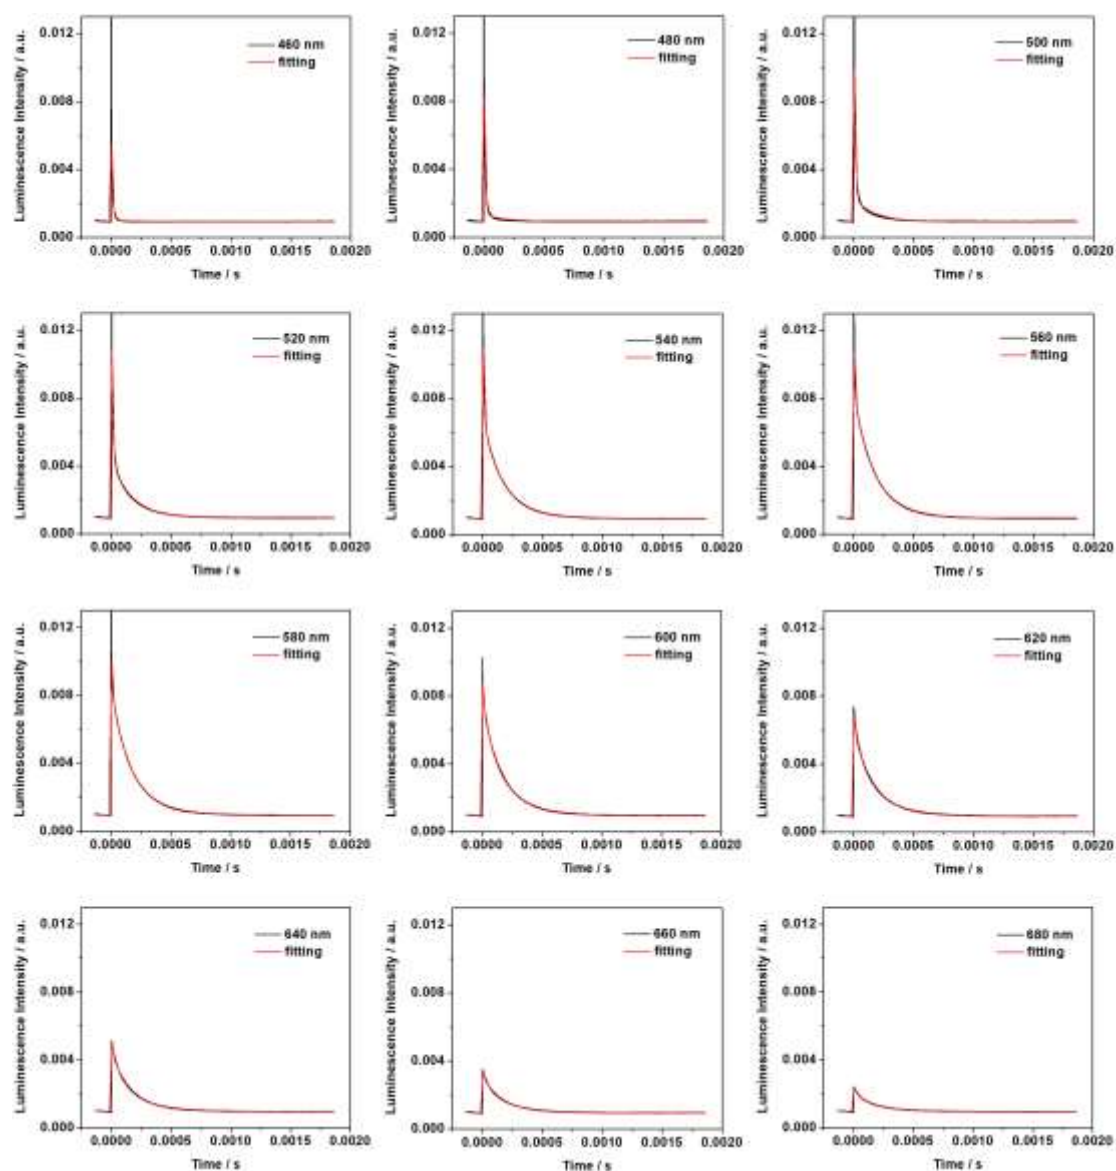

**Figure S27.** Luminescence decay traces obtained by the ns-ms time-resolved luminescence technique and the corresponding fittings to a multi-exponential decay for Ag<sub>1</sub>Li<sub>9</sub>Na<sub>2</sub>-LTA, at 298 K in a 2-ms time window ( $\lambda_{\text{ex}}=265$  nm,  $\lambda_{\text{det}}=460\text{-}680$  nm).



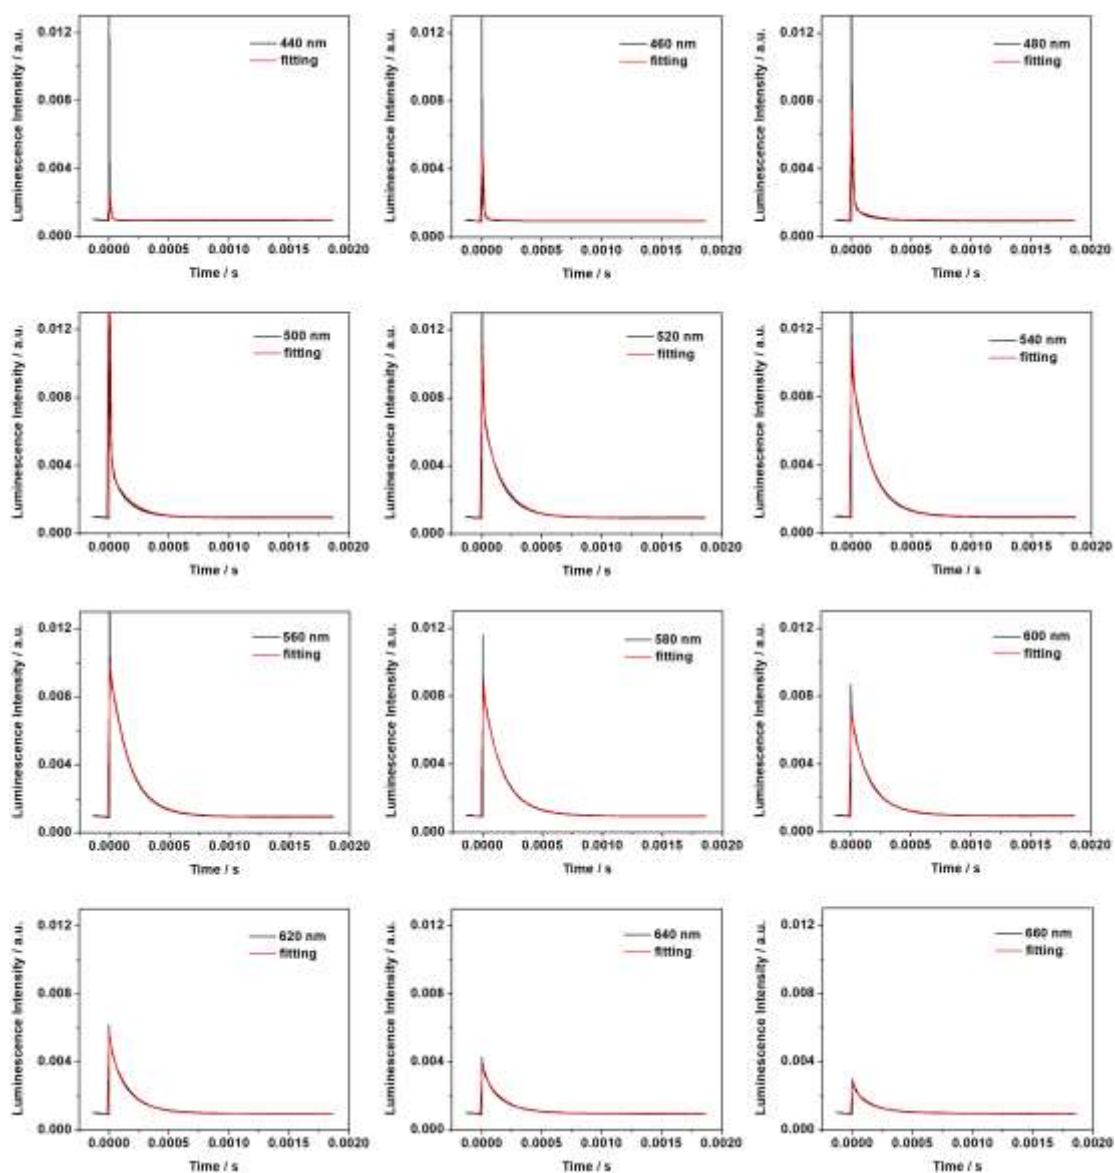

**Figure S28.** Luminescence decay traces obtained by the ns-ms time-resolved luminescence technique and the corresponding fittings to a multi-exponential decay for  $\text{Ag}_1\text{Li}_{10}\text{Na}_1\text{-LTA}$ , at 298 K in a 2-ms time window ( $\lambda_{\text{ex}}=265$  nm,  $\lambda_{\text{det}}=440\text{-}660$  nm).

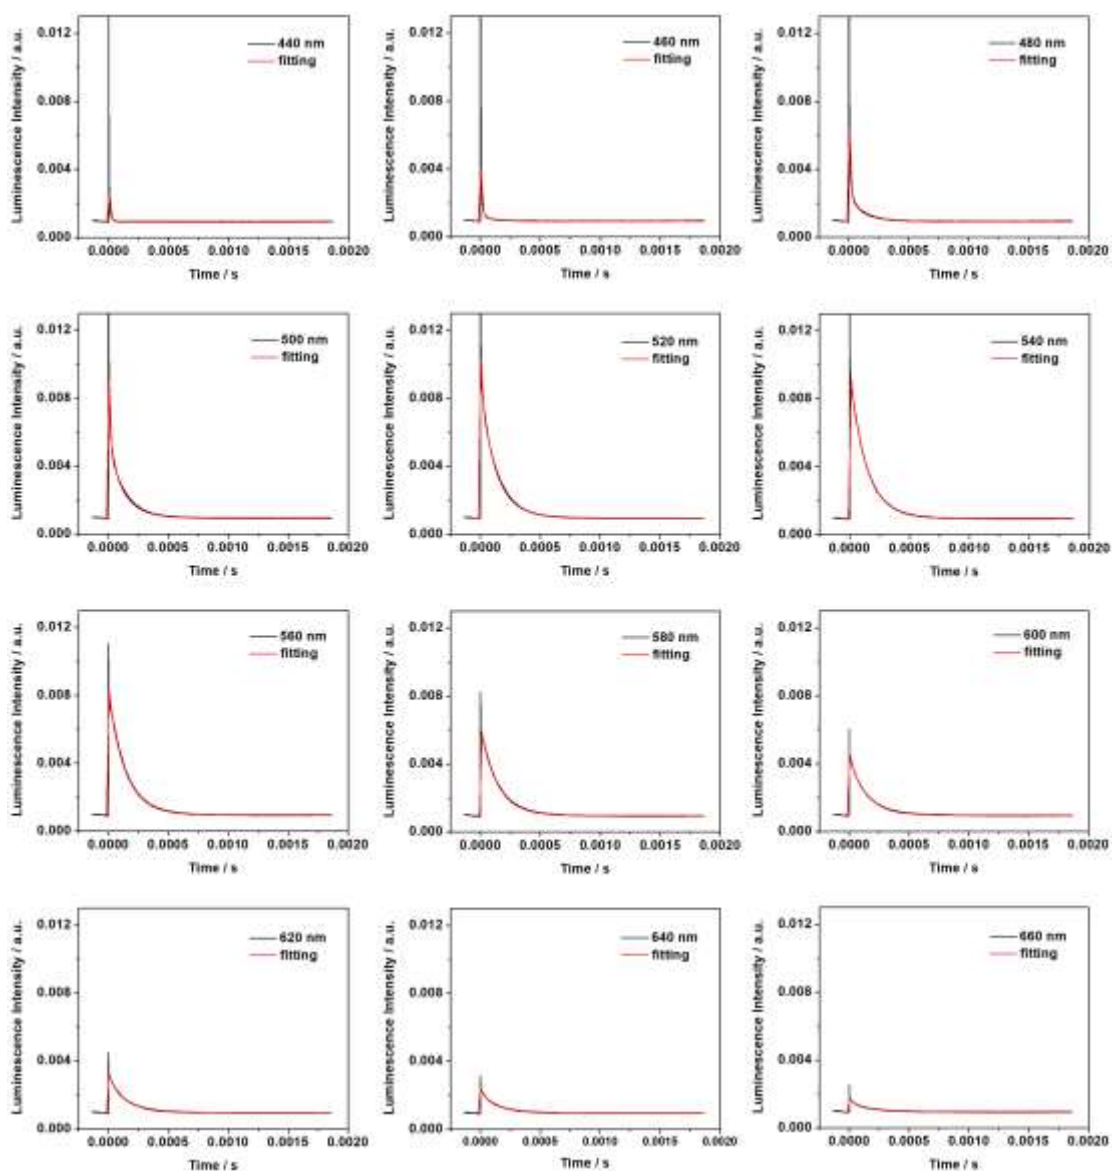

**Figure S29.** Luminescence decay traces obtained by the ns-ms time-resolved luminescence technique and the corresponding fittings to a multi-exponential decay for AgLi<sub>11</sub>Na<sub>0</sub>-LTA, at 298 K in a 2-ms time window ( $\lambda_{\text{ex}}=265$  nm,  $\lambda_{\text{det}}=440-660$  nm).



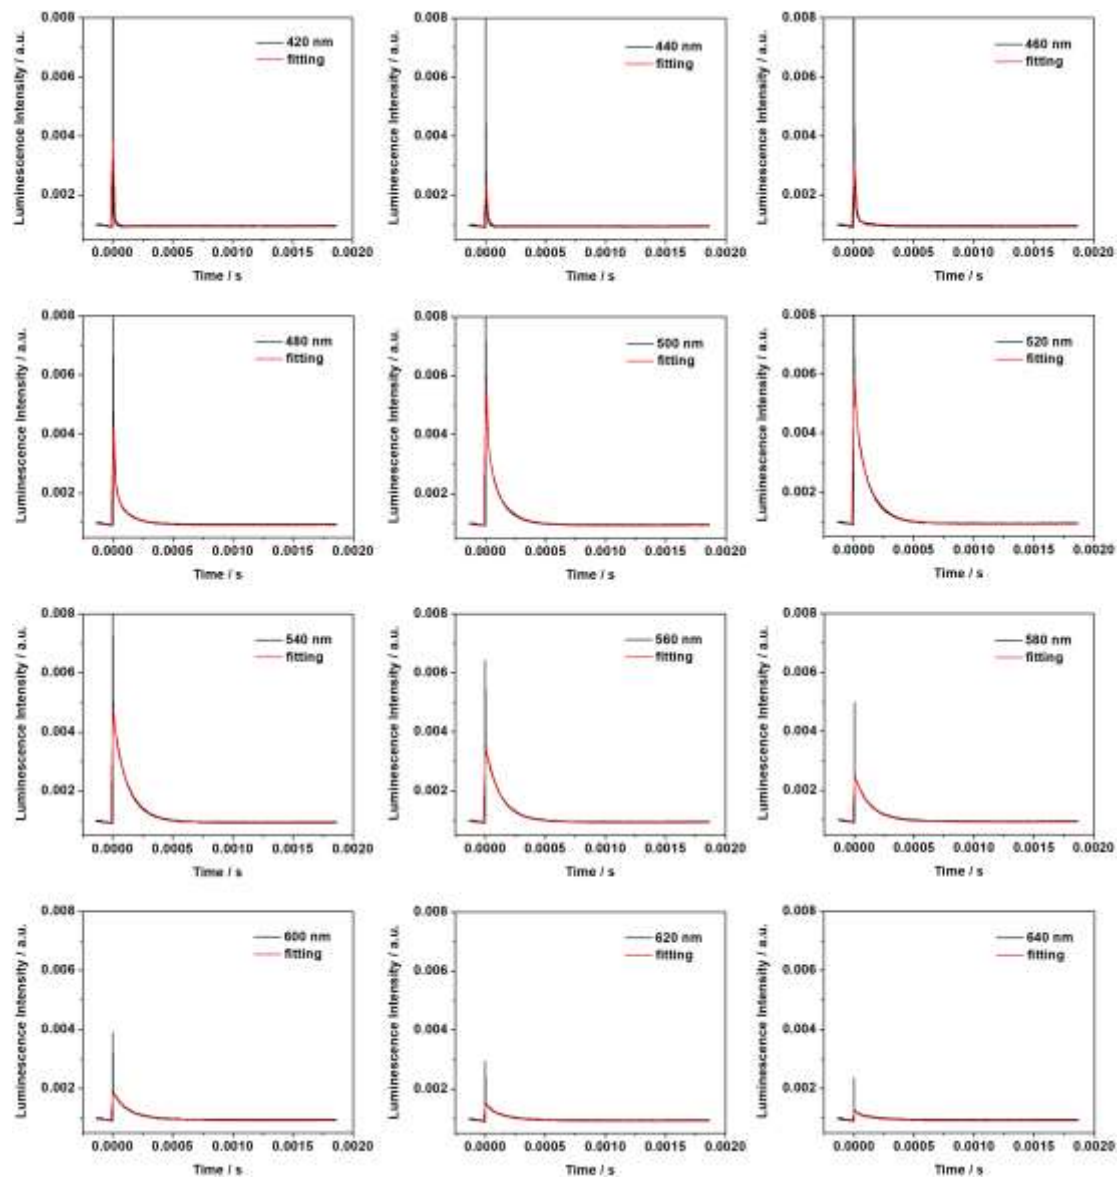

**Figure S30.** Luminescence decay traces obtained by the ns-ms time-resolved luminescence technique and the corresponding fittings to a multi-exponential decay for  $\text{Ag}_1\text{Li}_{11}\text{-LTA}$ , at 298 K in a 2-ms time window ( $\lambda_{\text{ex}}=265$  nm,  $\lambda_{\text{det}}=420\text{-}640$  nm).

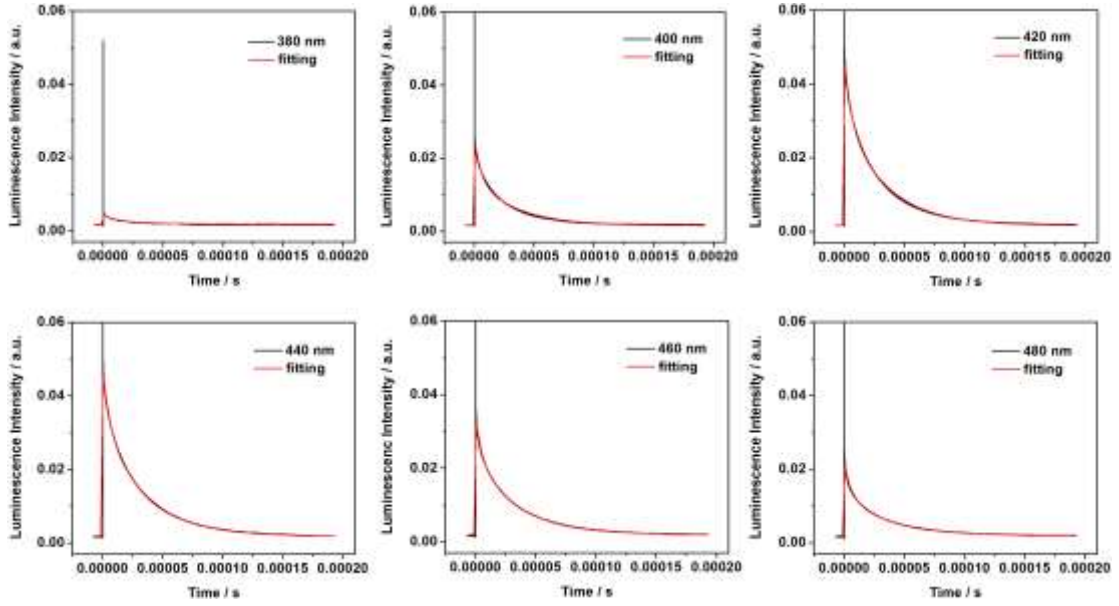

**Figure S31.** Luminescence decay traces obtained by the ns-ms time-resolved luminescence technique and the corresponding fittings to a multi-exponential decay for  $\text{Ag}_1\text{Li}_0\text{Na}_{11}\text{-LTA}$ , at 77 K in a 200- $\mu\text{s}$  time window ( $\lambda_{\text{ex}}=265$  nm,  $\lambda_{\text{det}}=380\text{-}480$  nm).

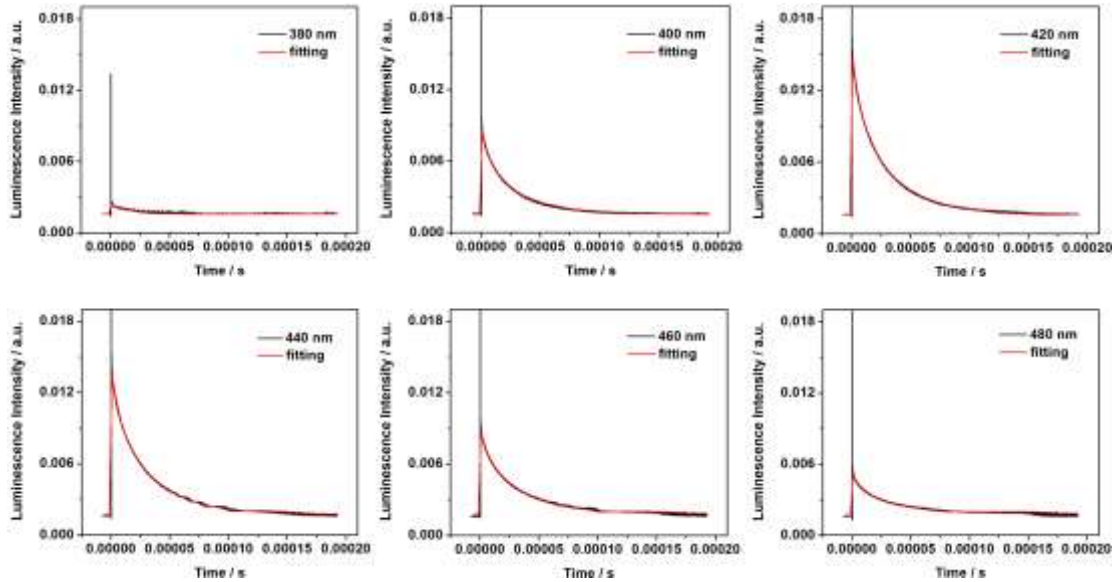

**Figure S32.** Luminescence decay traces obtained by the ns-ms time-resolved luminescence technique and the corresponding fittings to a multi-exponential decay for  $\text{Ag}_1\text{Li}_1\text{Na}_{10}\text{-LTA}$ , at 77 K in a 200- $\mu\text{s}$  time window ( $\lambda_{\text{ex}}=265$  nm,  $\lambda_{\text{det}}=380\text{-}480$  nm).

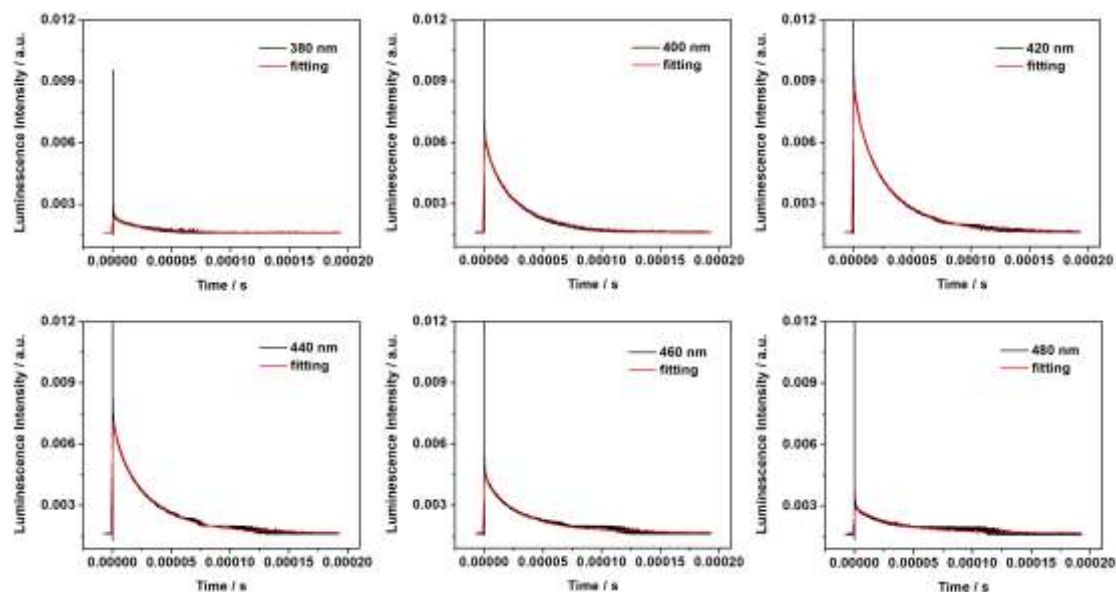

**Figure S33.** Luminescence decay traces obtained by the ns-ms time-resolved luminescence technique and the corresponding fittings to a multi-exponential decay for  $\text{Ag}_1\text{Li}_2\text{Na}_9\text{-LTA}$ , at 77 K in a 200- $\mu\text{s}$  time window ( $\lambda_{\text{ex}}=265$  nm,  $\lambda_{\text{det}}=380\text{-}480$  nm).

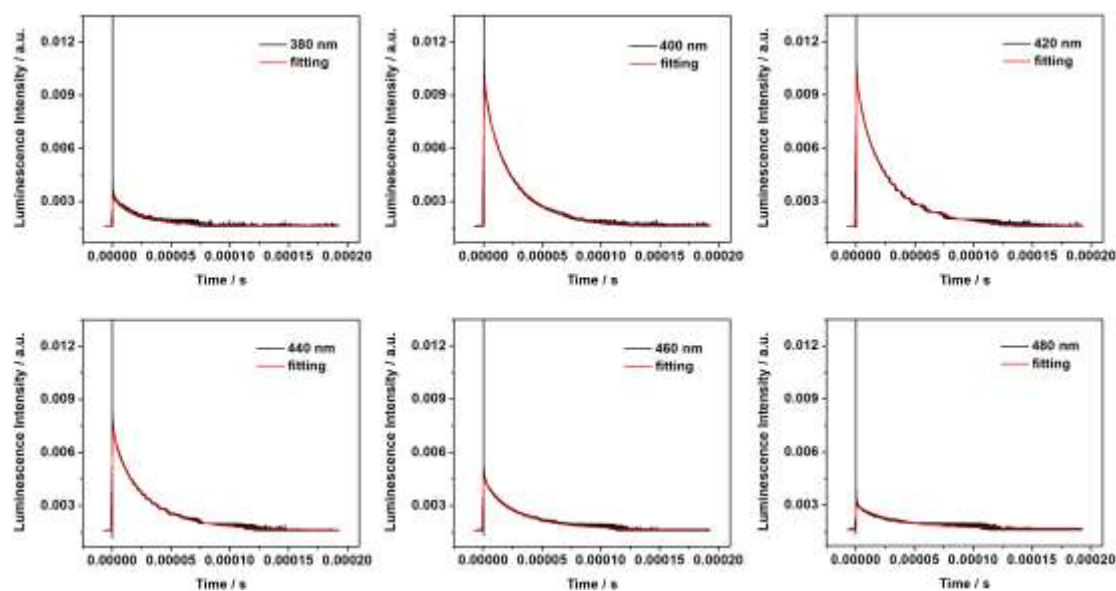

**Figure S34.** Luminescence decay traces obtained by the ns-ms time-resolved luminescence technique and the corresponding fittings to a multi-exponential decay for  $\text{Ag}_1\text{Li}_3\text{Na}_8\text{-LTA}$ , at 77 K in a 200- $\mu\text{s}$  time window ( $\lambda_{\text{ex}}=265$  nm,  $\lambda_{\text{det}}=380\text{-}480$  nm).

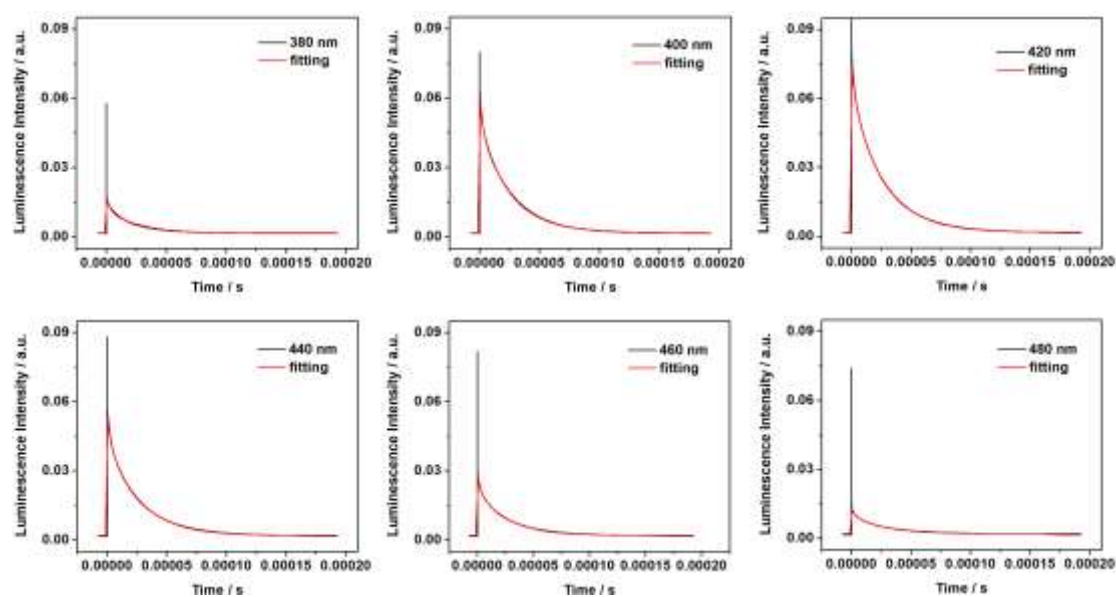

**Figure S35.** Luminescence decay traces obtained by the ns-ms time-resolved luminescence technique and the corresponding fittings to a multi-exponential decay for  $\text{Ag}_1\text{Li}_4\text{Na}_7\text{-LTA}$ , at 77 K in a 200- $\mu\text{s}$  time window ( $\lambda_{\text{ex}}=265$  nm,  $\lambda_{\text{det}}=380\text{-}480$  nm).

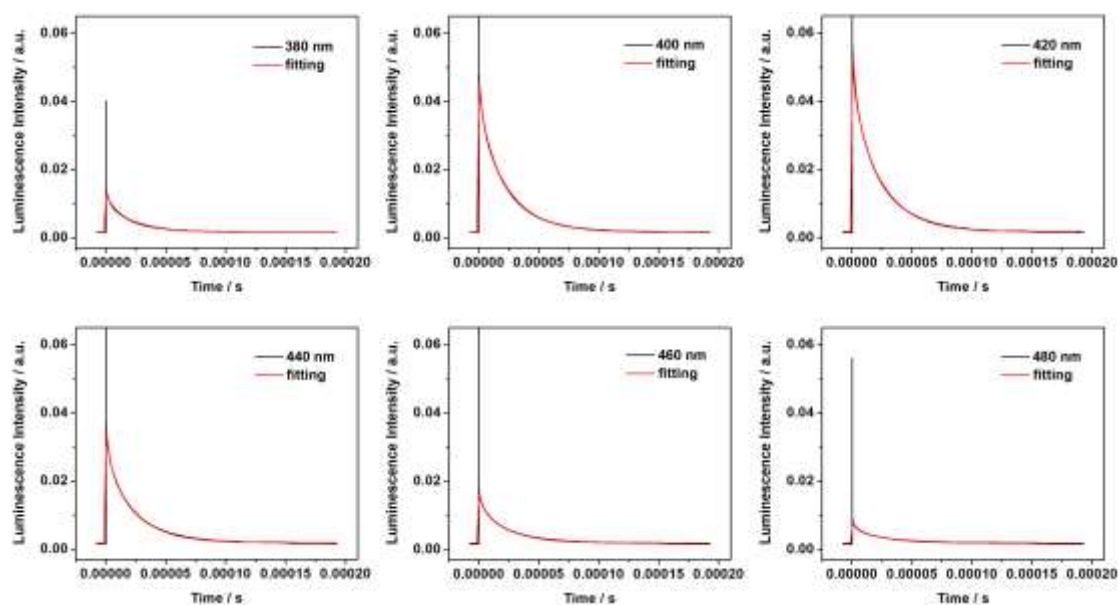

**Figure S36.** Luminescence decay traces obtained by the ns-ms time-resolved luminescence technique and the corresponding fittings to a multi-exponential decay for  $\text{Ag}_1\text{Li}_5\text{Na}_6\text{-LTA}$ , at 77 K in a 200- $\mu\text{s}$  time window ( $\lambda_{\text{ex}}=265$  nm,  $\lambda_{\text{det}}=380\text{-}480$  nm).

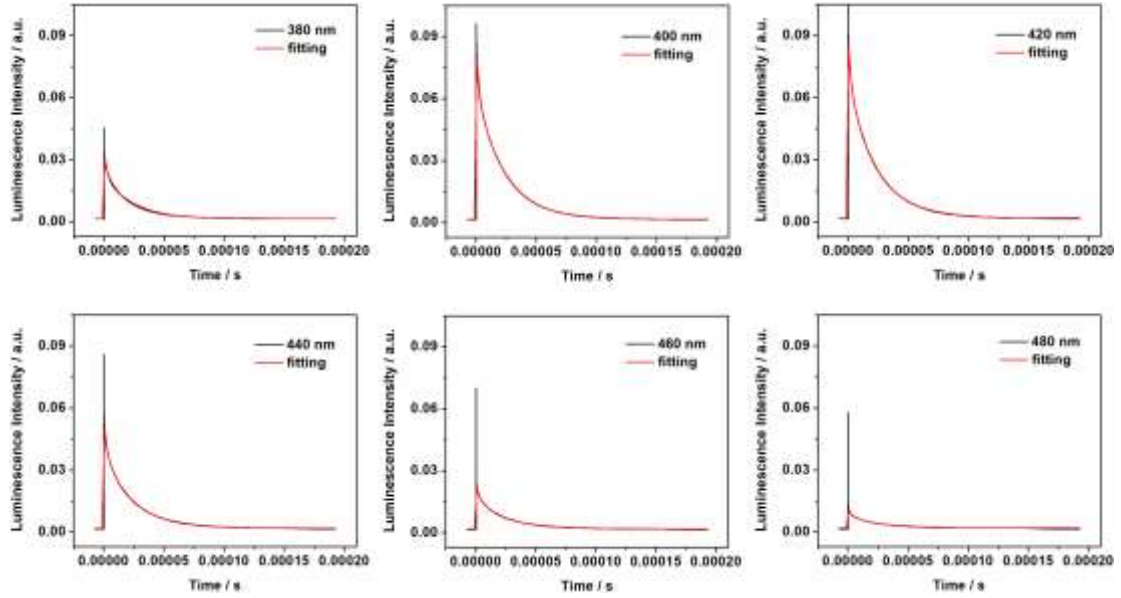

**Figure S37.** Luminescence decay traces obtained by the ns-ms time-resolved luminescence technique and the corresponding fittings to a multi-exponential decay for  $\text{Ag}_1\text{Li}_7\text{Na}_4\text{-LTA}$ , at 77 K in a 200- $\mu\text{s}$  time window ( $\lambda_{\text{ex}}=265$  nm,  $\lambda_{\text{det}}=380\text{-}480$  nm).

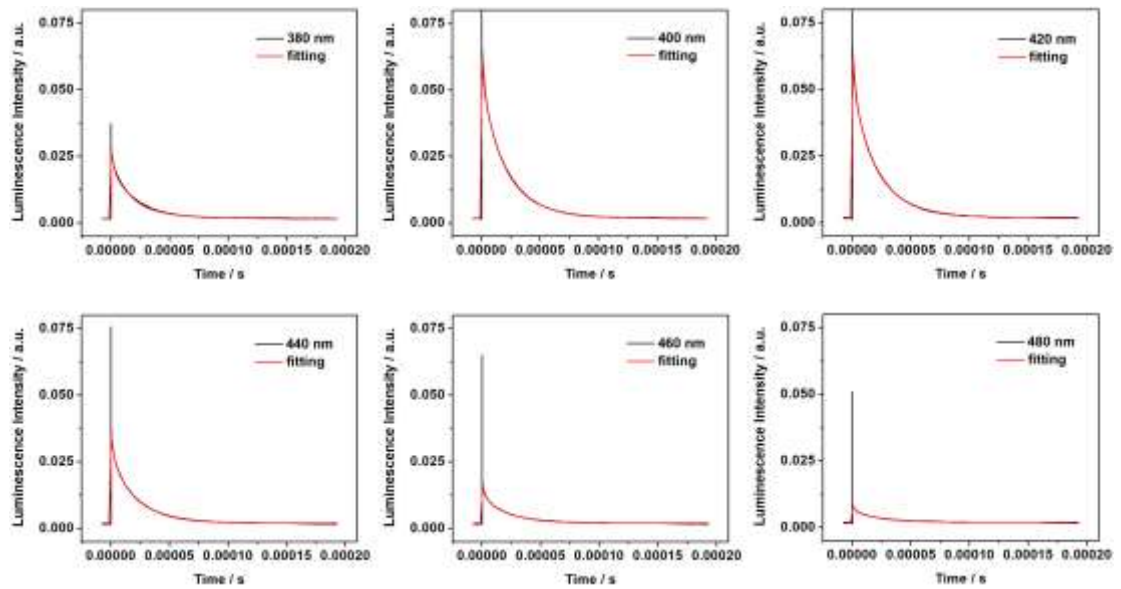

**Figure S38.** Luminescence decay traces obtained by the ns-ms time-resolved luminescence technique and the corresponding fittings to a multi-exponential decay for  $\text{Ag}_1\text{Li}_8\text{Na}_3\text{-LTA}$ , at 77 K in a 200- $\mu\text{s}$  time window ( $\lambda_{\text{ex}}=265$  nm,  $\lambda_{\text{det}}=380\text{-}480$  nm).



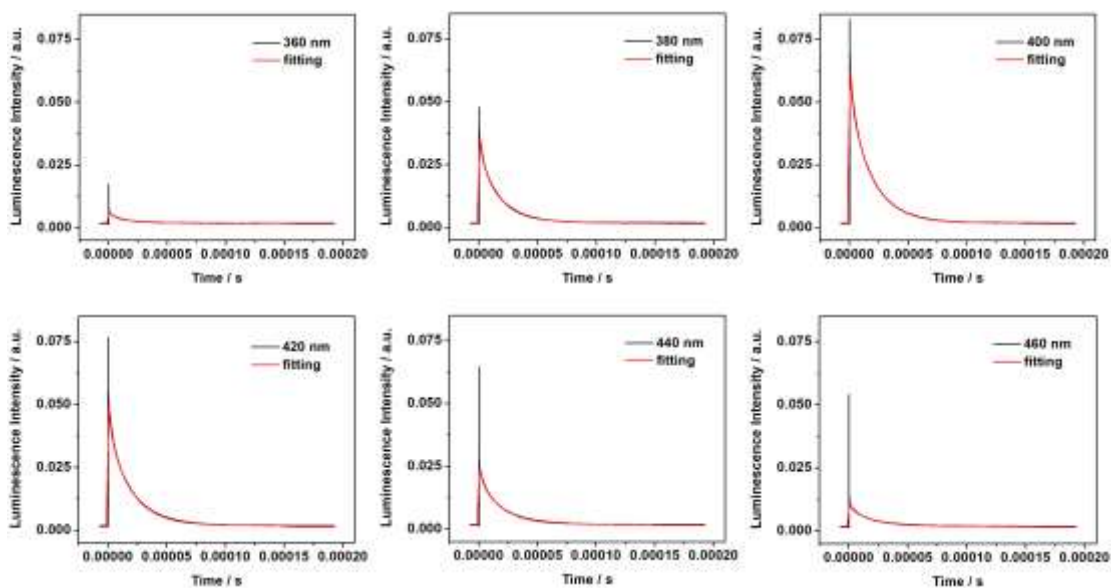

**Figure S39.** Luminescence decay traces obtained by the ns-ms time-resolved luminescence technique and the corresponding fittings to a multi-exponential decay for  $\text{Ag}_1\text{Li}_9\text{Na}_2\text{-LTA}$ , at 77 K in a 200- $\mu\text{s}$  time window ( $\lambda_{\text{ex}}=265$  nm,  $\lambda_{\text{det}}=360\text{-}460$  nm).

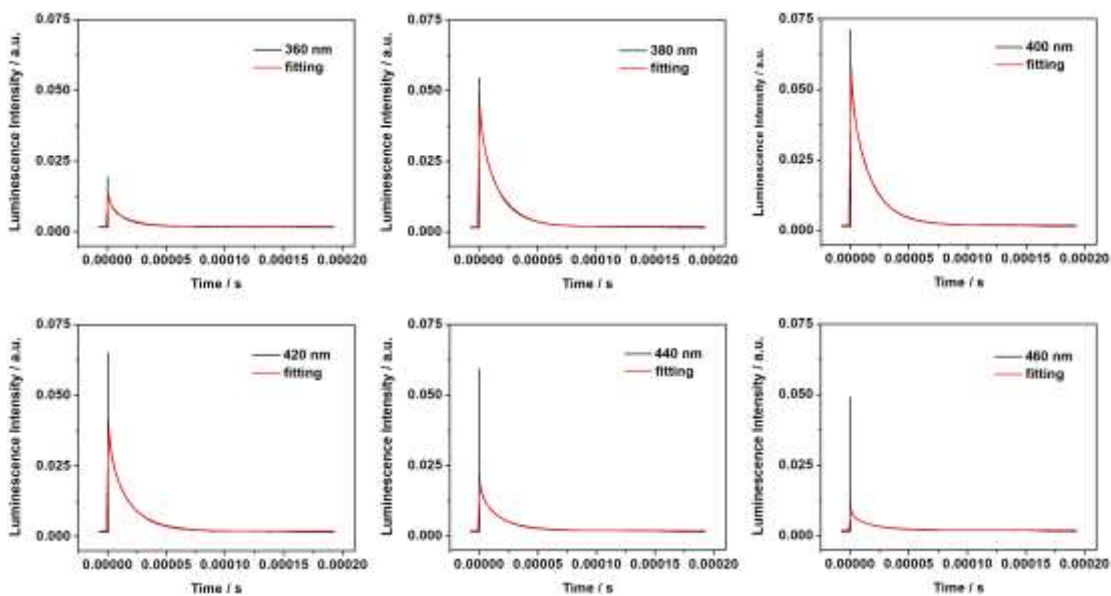

**Figure S40.** Luminescence decay traces obtained by the ns-ms time-resolved luminescence technique and the corresponding fittings to a multi-exponential decay for  $\text{Ag}_1\text{Li}_{10}\text{Na}_1\text{-LTA}$ , at 77 K in a 200- $\mu\text{s}$  time window ( $\lambda_{\text{ex}}=265$  nm,  $\lambda_{\text{det}}=360\text{-}460$  nm).

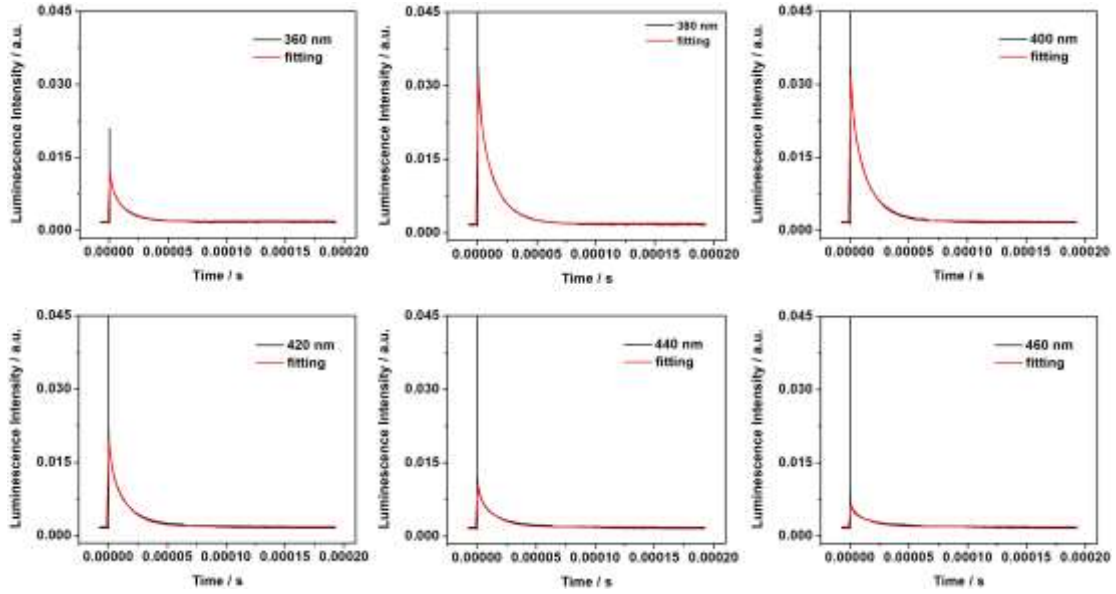

**Figure S41.** Luminescence decay traces obtained by the ns-ms time-resolved luminescence technique and the corresponding fittings to a multi-exponential decay for  $\text{Ag}_1\text{Li}_{11}\text{Na}_0\text{-LTA}$ , at 77 K in a 200- $\mu\text{s}$  time window ( $\lambda_{\text{ex}}=265$  nm,  $\lambda_{\text{det}}=360\text{-}460$  nm).

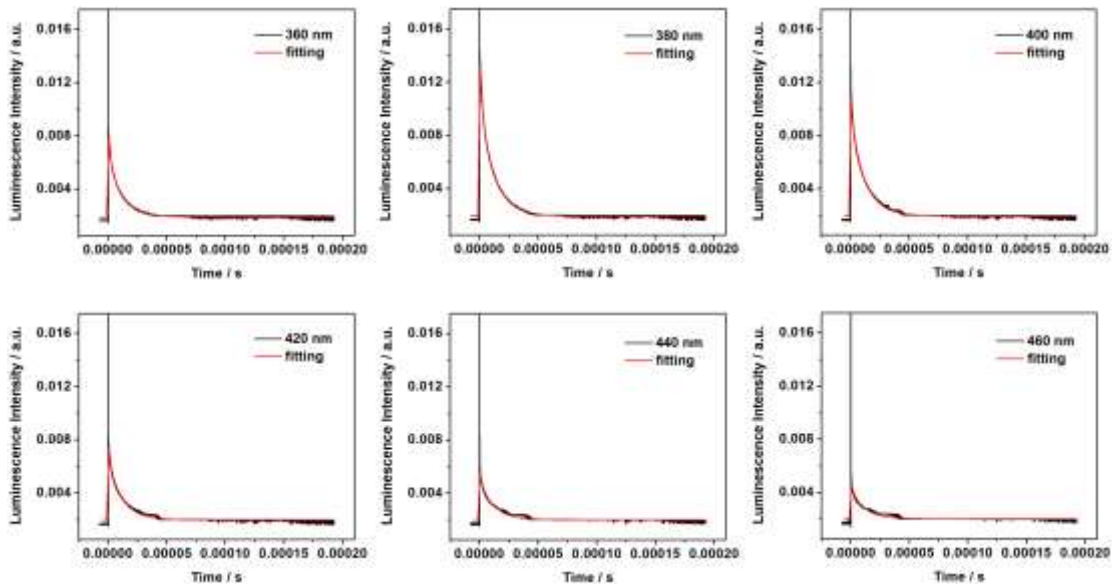

**Figure S42.** Luminescence decay traces obtained by the ns-ms time-resolved luminescence technique and the corresponding fittings to a multi-exponential decay for  $\text{Ag}_1\text{Li}_{11}\text{-LTA}$ , at 77 K in a 200- $\mu\text{s}$  time window ( $\lambda_{\text{ex}}=265$  nm,  $\lambda_{\text{det}}=360\text{-}460$  nm).

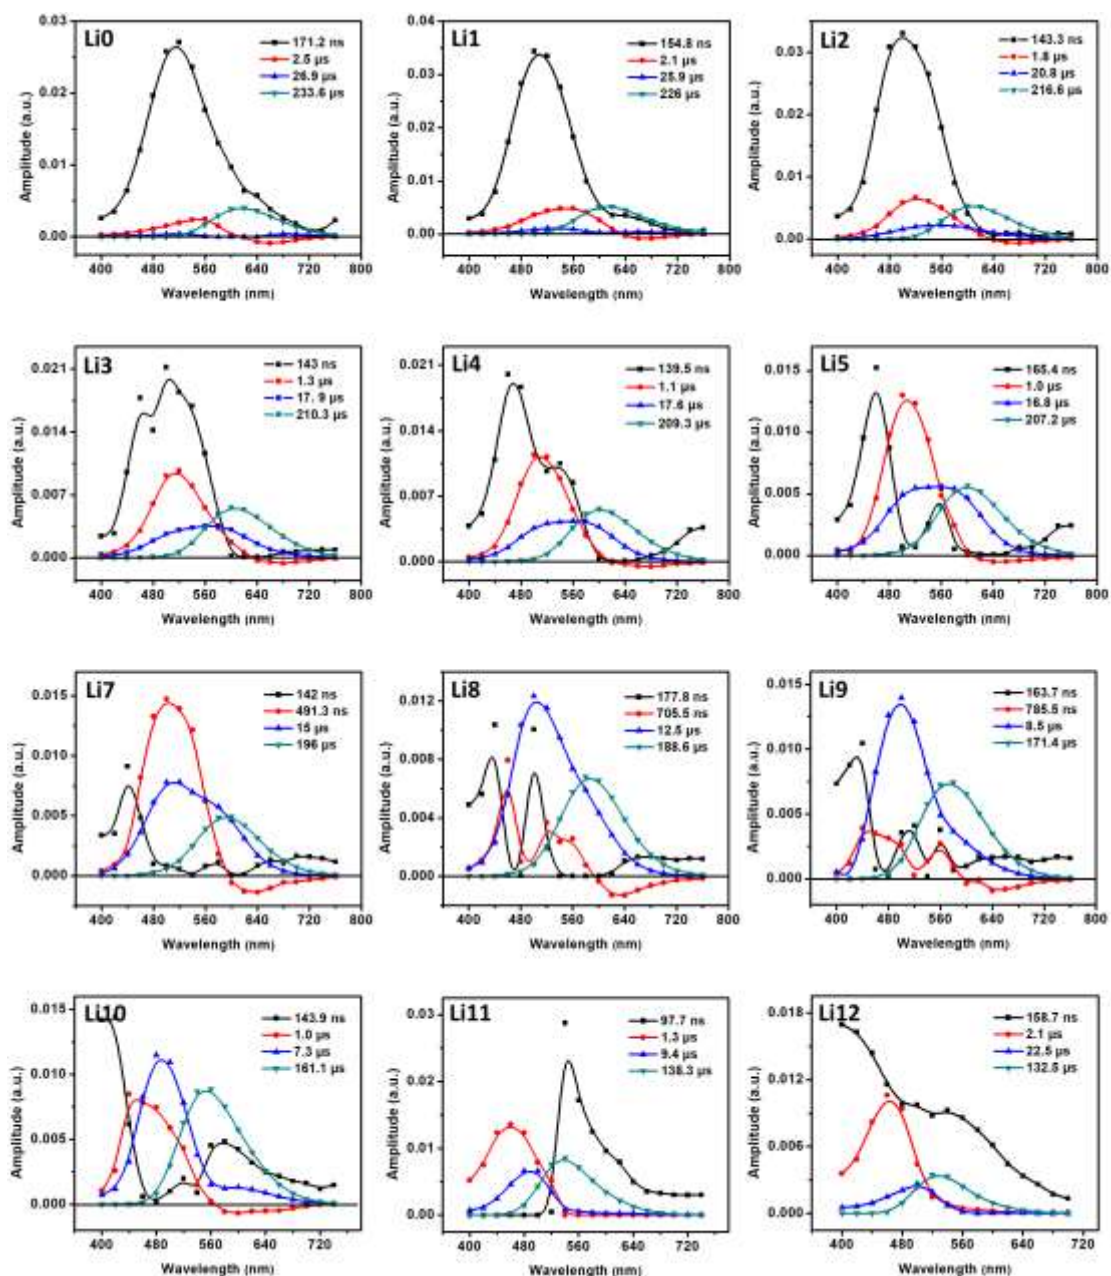

**Figure S43.** The amplitude-to-wavelength dependence (AWD) of the different decay components obtained by the ns-ms time-resolved luminescence technique for  $\text{Ag}_1$ -exchanged  $\text{Li}_x\text{Na}_{12-x}\text{LTA}$  ( $x=0-12$ ), at 298 K in a 2-ms time window ( $\lambda_{\text{ex}}=265$  nm,  $\lambda_{\text{det}}=400-760$  nm).



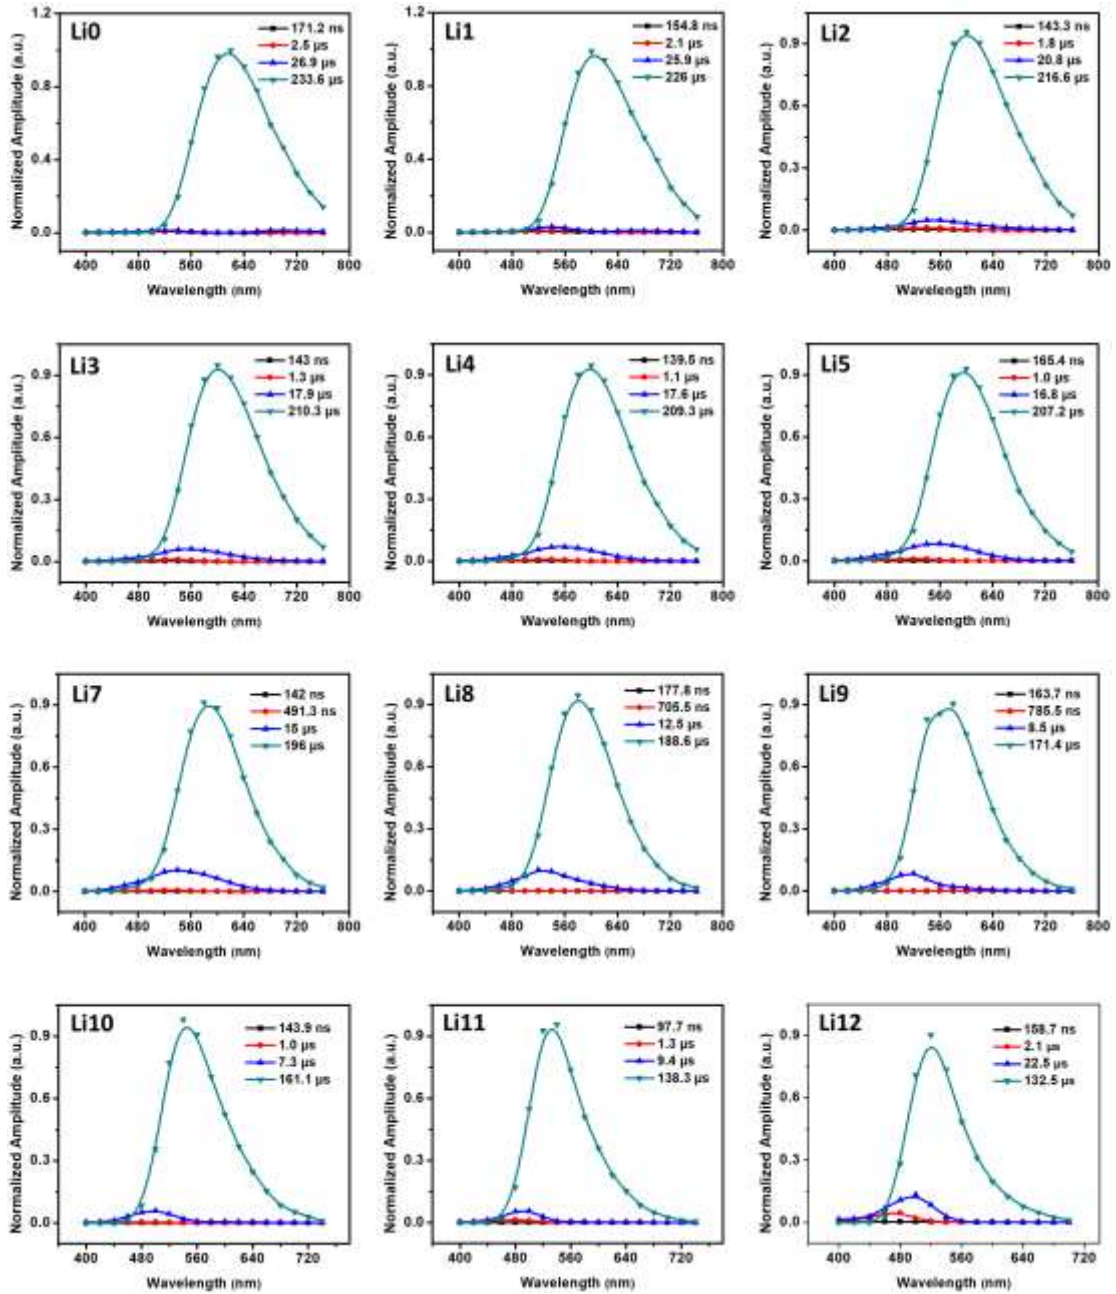

**Figure S44.** The decay associated spectra (DAS) of the different decay components obtained by the ns-ms time-resolved luminescence technique for Ag<sub>1</sub>-exchanged Li<sub>x</sub>Na<sub>12-x</sub>-LTA (x=0-12), at 298 K in a 2-ms time window ( $\lambda_{\text{ex}}=265$  nm,  $\lambda_{\text{det}}=400-760$  nm).

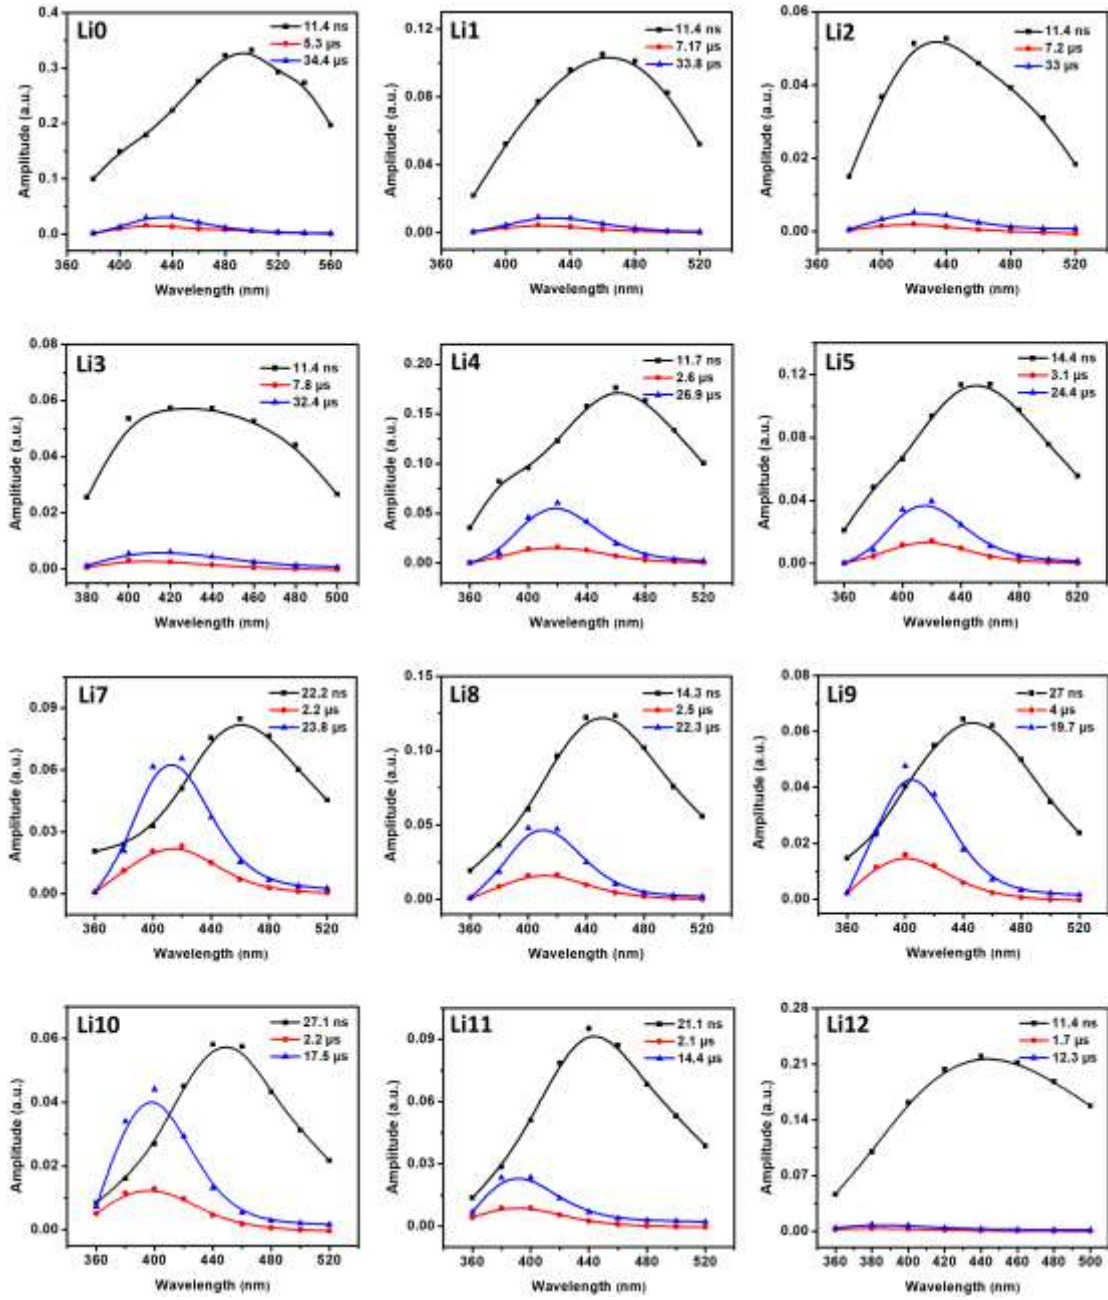

**Figure S45.** The amplitude-to-wavelength dependence (AWD) of the different decay components obtained by the ns-ms time-resolved luminescence technique for  $\text{Ag}_1$ -exchanged  $\text{Li}_x\text{Na}_{12-x}\text{-LTA}$  ( $x=0-12$ ), at 77 K in a 200- $\mu\text{s}$  time window ( $\lambda_{\text{ex}}=265$  nm,  $\lambda_{\text{det}}=360-560$  nm).

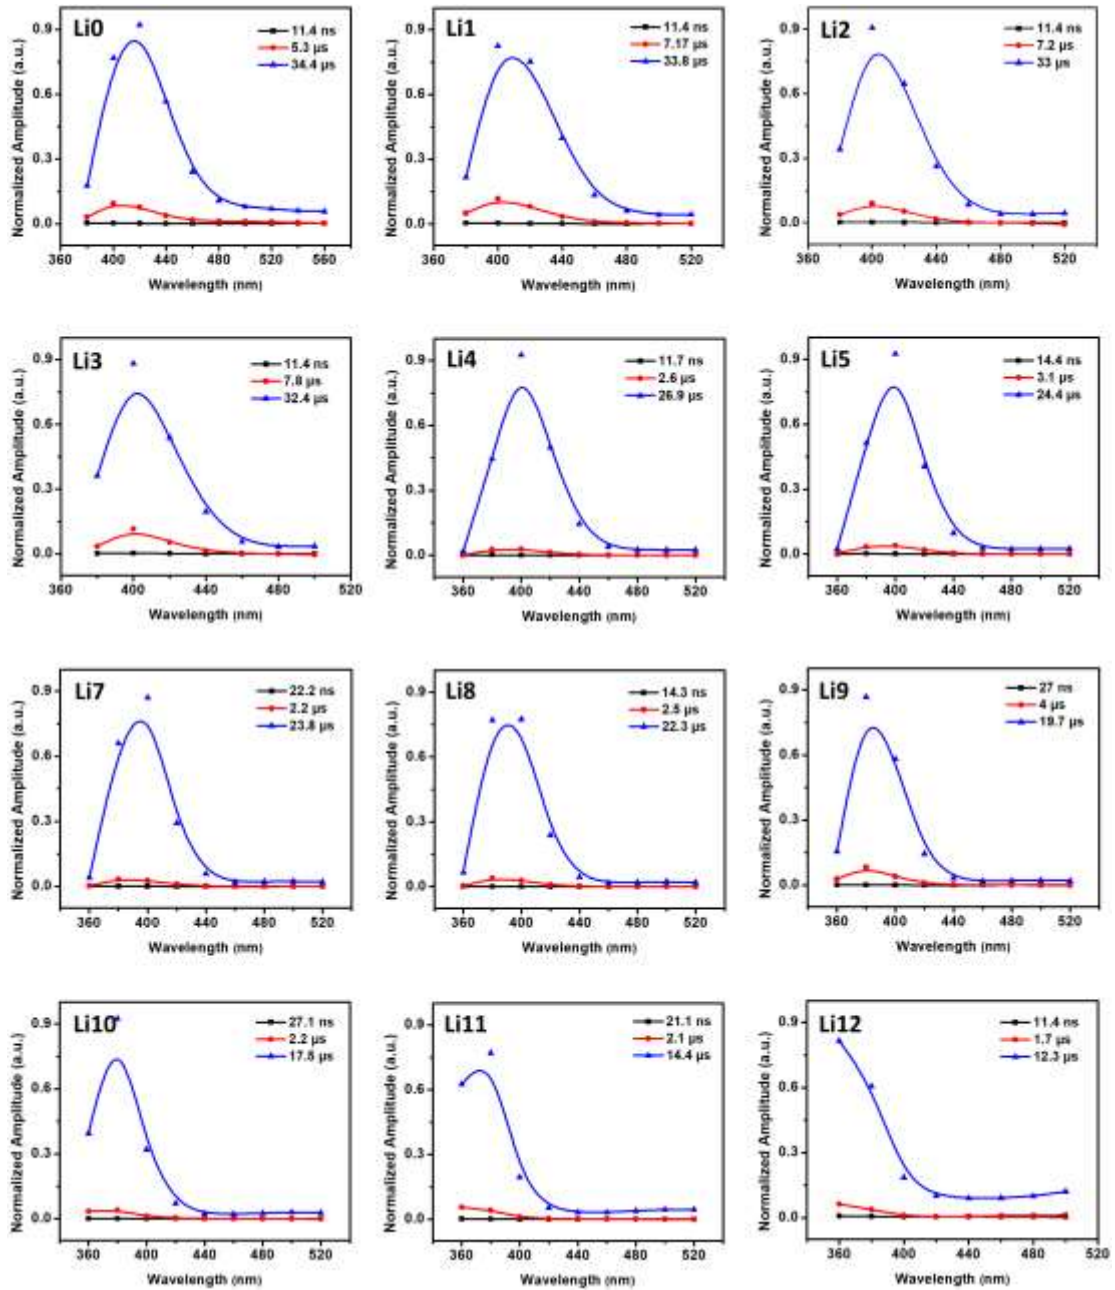

**Figure S46.** The decay associated spectra (DAS) of the different decay components obtained by the ns-ms time-resolved luminescence technique for  $\text{AgI}$ -exchanged  $\text{Li}_x\text{Na}_{12-x}\text{-LTA}$  (x=0-12), at 77 K in a 200- $\mu\text{s}$  time window ( $\lambda_{\text{ex}}=265$  nm,  $\lambda_{\text{det}}=360\text{-}560$  nm).

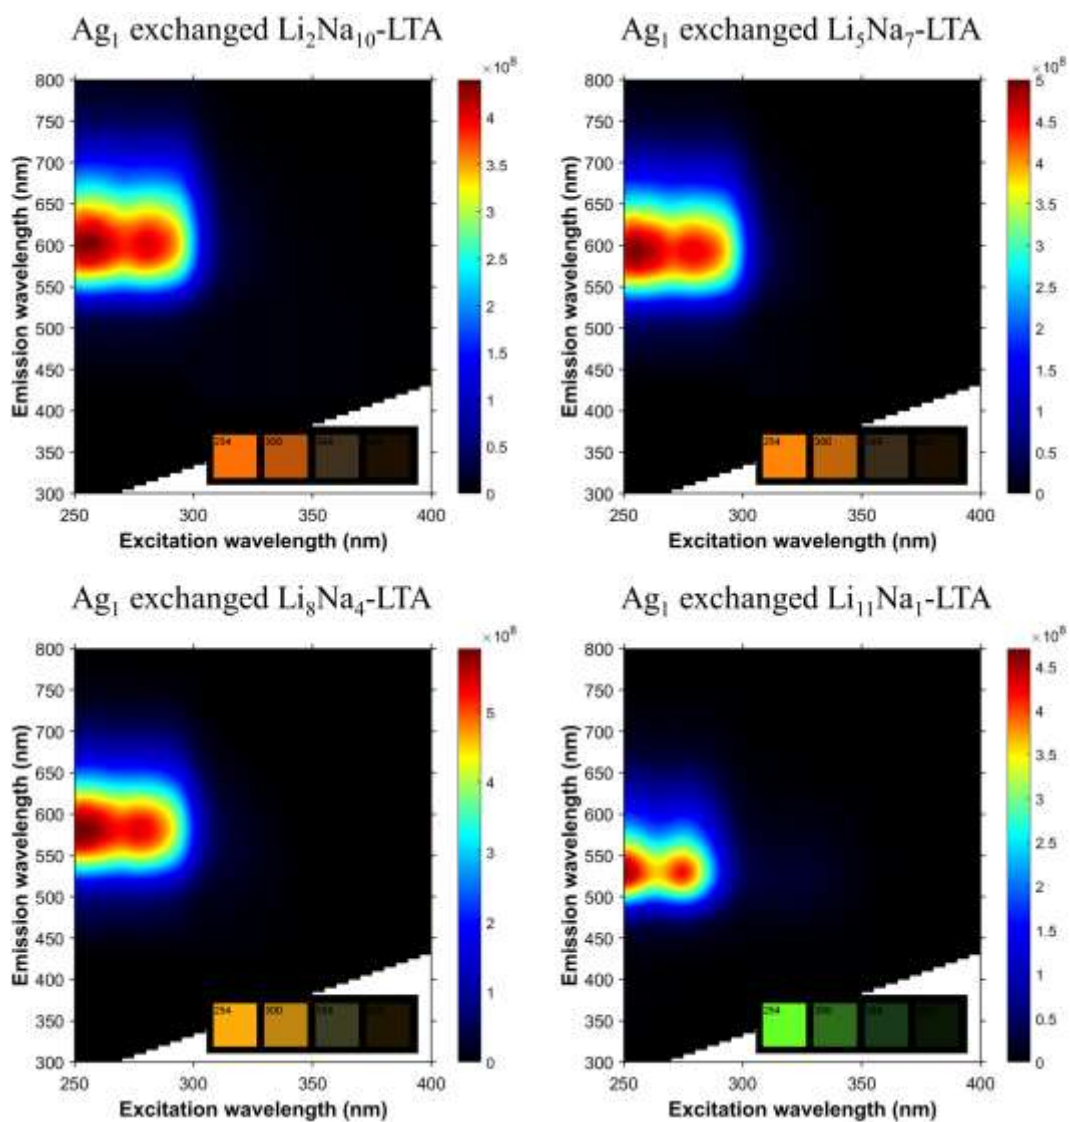

**Figure S47.** The re-checked two-dimensional excitation/emission plots of hydrated  $\text{AgI}$ -exchanged  $\text{Li}_x\text{Na}_{12-x}\text{-LTA}$  ( $x=2, 5, 8, 11$ ) samples at 298 K after the measurements of the low temperature PL and time-resolved luminescence.



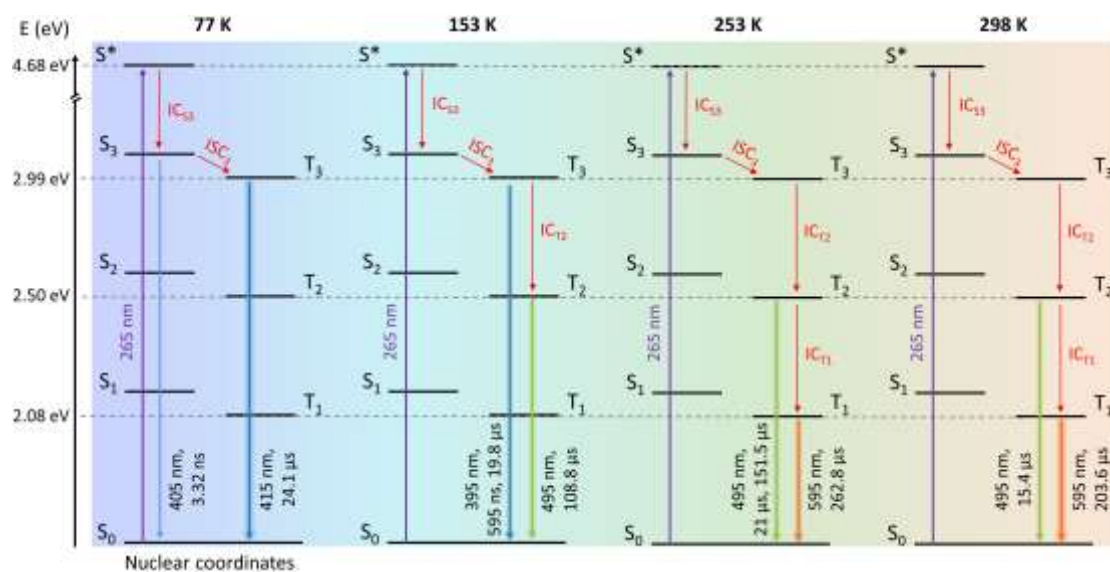

**Figure S48.** Simplified version of the proposed kinetic scheme of the processes observed upon excitation of Ag<sub>1</sub>Li<sub>6</sub>Na<sub>5</sub>LTA at the specified temperatures ( $\lambda_{\text{ex}}=265$  nm) assuming that the internal conversion occurs only between the different triplet states. As discussed in main text, this kinetic model is based on relaxation by internal conversion between triplet states (IC<sub>T</sub>) together with geometry changes of AgCLs. These geometry changes require to overcome the energy barrier between the different triplet excited states by thermal activation.

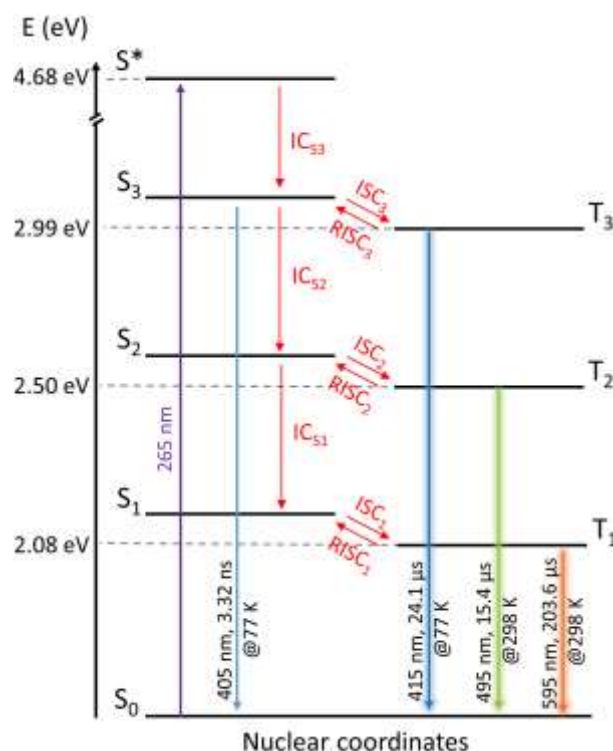

**Figure S49.** Simplified version of the proposed kinetic scheme of the processes observed upon excitation of  $\text{Ag}_1\text{Li}_6\text{Na}_5\text{LTA}$  as the function of temperature ( $\lambda_{\text{ex}}=265$  nm) assuming that the internal conversion occurs only between the different singlet states. As another possibility of the interconversion by overcoming the observed barrier, this scheme requires RISC from triplet to singlet excited states under thermal activation.

The long decay times of the main emission components suggest that the emitting species is always populated through a triplet state. This emitting species can be either the triplet state or a singlet state in equilibrium with a triplet state. In the latter case an equilibrium between singlet and triplet states is established by a combination of intersystem crossing and reverse intersystem crossing characterized by the rate constants  $k_{\text{ISC}}$  and  $k_{\text{RISC}}$ . The establishment of this equilibrium would require that  $k_{\text{T3-S0}}+k_{\text{ICT2}}<k_{\text{RISC3}}$  (Or  $k_{\text{T2-S0}}+k_{\text{ICT1}}<k_{\text{RISC2}}$  or  $k_{\text{T1-S0}}<k_{\text{RISC1}}$ ).

Contrary to what was concluded for  $\text{Ag}_3\text{Na}_9\text{-LTA}$  by Fron et al.,<sup>3</sup> it is unlikely that in the systems reported here, reversible population of traps is responsible for the long decay times. If traps would be involved, it is difficult to see why traps populated from  $S_3$  only yield  $S_3$  on detrapping and not  $S_2$  or  $S_1$ . It is difficult to see how each of the three different emitting states would be linked to a specific and different trap.

Hence transition from  $S_3$  to  $S_2$  (or  $T_3$  to  $T_2$ ) will involve a geometric relaxation, probably associated with an energy barrier as the rate of this conversion is temperature dependent. We can expect that this relaxation and the corresponding barrier are similar for singlet and triplet states. Hence the values of  $k_{ICT2}$  and  $k_{ICS2}$  (or  $k_{ICT1}$  and  $k_{ICS1}$ ) will be similar. Although both processes are expected to occur with similar rate constant, they will not occur with similar efficiency. As  $\tau_{T3}=1/(k_{T3-S0}+k_{ICT2})$  and  $\tau_{S3}=1/(k_{S3-S0}+k_{ICS2})$ , while we expect  $k_{ICT2} \approx k_{ICS2}$ ,  $k_{S3-S0} > k_{T3-S0}$  leads to  $\tau_{S3} < \tau_{T3}$ . Consequently, the efficiency of  $k_{ICT2}$  (which equals to  $k_{ICT2}/(k_{T3-S0}+k_{ICT2})$ ) will be much larger than  $k_{ICS2}$  (which equals to  $k_{ICS2}/(k_{S3-S0}+k_{ICS2})$ ), which means that the geometric relaxation prefers to take the highly efficient  $IC_T$  pathway (the same at higher temperatures as  $k_{S2-S0}$  is also much larger than  $k_{T2-S0}$ ). Even when the triplets and corresponding singlets are equilibrated and undergo a rapid transition by  $ISC_3$  and  $RISC_3$ , the concepts discussed above remain valid.

**Table S1.** Theoretical and measured atomic composition of  $Ag_1$ -exchanged  $Li_xNa_{12-x}$ -LTA ( $x=1, 4, 6, 8, 11$ ) and Li fully exchanged LiLTA zeolites for the elements Ag, Li and Na.

| Sample | Atomic composition |
|--------|--------------------|--------------------|--------------------|--------------------|--------------------|--------------------|
|        | Ag                 | Ag                 | Li                 | Li                 | Na                 | Na                 |
|        | (theoretical)      | (measured)         | (theoretical)      | (measured)         | (theoretical)      | (measured)         |
| Li1*   | 1                  | 1.08               | 1                  | 0.69               | 10                 | 10.31              |
| Li4*   | 1                  | 1.07               | 4                  | 3.69               | 7                  | 7.31               |
| Li6*   | 1                  | 1.04               | 6                  | 6.10               | 5                  | 4.90               |
| Li8*   | 1                  | 1.10               | 8                  | 7.86               | 3                  | 3.14               |
| Li11*  | 1                  | 1.09               | 11                 | 10.45              | 0                  | 0.55               |
| LiLTA  | 0                  | 0                  | 12                 | 11.96              | 0                  | 0.04               |

\*Where  $Ag_1$ -exchanged  $Li_xNa_{12-x}$ -LTA ( $x=1, 4, 6, 8, 11$ ) samples are denoted as  $Li_x$  ( $x=1, 4, 6, 8, 11$ ) respectively.

**Table S2.** The maximum of excitation and emission spectrum, FWHM of the emission spectrum and PLQY of Ag<sub>1</sub>-exchanged Li<sub>x</sub>Na<sub>12-x</sub>-LTA (x=1-12) at 298 K.

| Ag <sub>1</sub> -<br>exchanged<br>samples | Max.<br>excitation<br>(nm) |     | Max.<br>emission<br>(nm) | FWHM<br>(cm <sup>-1</sup> ) | PLQY (%) |         |
|-------------------------------------------|----------------------------|-----|--------------------------|-----------------------------|----------|---------|
|                                           | ex.                        | ex. |                          |                             | 250-255  | 270-285 |
| Li <sub>0</sub> Na <sub>12</sub> -LTA     | 252                        | 279 | 615                      | 3469±24                     | 37       | 40      |
| Li <sub>1</sub> Na <sub>11</sub> -LTA     | 252                        | 276 | 610                      | 3458±28                     | 33       | 34      |
| Li <sub>2</sub> Na <sub>10</sub> -LTA     | 250                        | 279 | 595                      | 3492±27                     | 33       | 36      |
| Li <sub>3</sub> Na <sub>9</sub> -LTA      | 250                        | 278 | 594                      | 3449±18                     | 41       | 36      |
| Li <sub>4</sub> Na <sub>8</sub> -LTA      | 250                        | 277 | 593                      | 3420±17                     | 41       | 37      |
| Li <sub>5</sub> Na <sub>7</sub> -LTA      | 250                        | 277 | 593                      | 3389±17                     | 44       | 39      |
| Li <sub>6</sub> Na <sub>6</sub> -LTA      | 250                        | 276 | 592                      | 3338±16                     | 36       | 32      |
| Li <sub>7</sub> Na <sub>5</sub> -LTA      | 250                        | 277 | 588                      | 3309±14                     | 36       | 33      |
| Li <sub>8</sub> Na <sub>4</sub> -LTA      | 252                        | 276 | 578                      | 3339±12                     | 38       | 37      |
| Li <sub>9</sub> Na <sub>3</sub> -LTA      | 250                        | 274 | 563                      | 3449±21                     | 36       | 36      |
| Li <sub>10</sub> Na <sub>2</sub> -LTA     | 250                        | 272 | 540                      | 3401±38                     | 35       | 33      |
| Li <sub>11</sub> Na <sub>1</sub> -LTA     | 250                        | 273 | 530                      | 3256±39                     | 22       | 20      |
| Li <sub>12</sub> Na <sub>0</sub> -LTA     | 250                        | 274 | 515                      | 3015±36                     | 7        | 5       |

**Table S3.** The maximum of excitation and emission spectrum, FWHM of the emission spectrum and PLQY of Ag<sub>1</sub>-exchanged Li<sub>x</sub>Na<sub>12-x</sub>-LTA (x=1-12) at 77 K.

| Ag <sub>1</sub> -<br>exchanged<br>samples | Max.<br>excitation<br>(nm) |     | Max.<br>emission<br>(nm) | FWHM<br>(cm <sup>-1</sup> ) | PLQY (%) |         |
|-------------------------------------------|----------------------------|-----|--------------------------|-----------------------------|----------|---------|
|                                           | ex.                        | ex. |                          |                             | 250-255  | 270-285 |
| Li <sub>0</sub> Na <sub>12</sub> -LTA     | 258                        | 283 | 412                      | 2994±32                     | 52       | 63      |
| Li <sub>1</sub> Na <sub>11</sub> -LTA     | 257                        | 282 | 405                      | 2881±29                     | 54       | 67      |
| Li <sub>2</sub> Na <sub>10</sub> -LTA     | 255                        | 280 | 400                      | 2697±24                     | 56       | 68      |
| Li <sub>3</sub> Na <sub>9</sub> -LTA      | 255                        | 281 | 398                      | 2626±21                     | 58       | 74      |
| Li <sub>4</sub> Na <sub>8</sub> -LTA      | 255                        | 280 | 396                      | 2507±20                     | 56       | 66      |
| Li <sub>5</sub> Na <sub>7</sub> -LTA      | 256                        | 279 | 395                      | 2443±18                     | 52       | 72      |
| Li <sub>6</sub> Na <sub>6</sub> -LTA      | 254                        | 279 | 393                      | 2432±15                     | 55       | 73      |
| Li <sub>7</sub> Na <sub>5</sub> -LTA      | 254                        | 279 | 392                      | 2372±14                     | 56       | 64      |
| Li <sub>8</sub> Na <sub>4</sub> -LTA      | 254                        | 279 | 389                      | 2361±13                     | 57       | 64      |
| Li <sub>9</sub> Na <sub>3</sub> -LTA      | 253                        | 276 | 385                      | 2421±15                     | 65       | 75      |
| Li <sub>10</sub> Na <sub>2</sub> -LTA     | 250                        | 275 | 376                      | 2392±21                     | 61       | 66      |
| Li <sub>11</sub> Na <sub>1</sub> -LTA     | 250                        | 275 | 372                      | 2341±27                     | 47       | 45      |
| Li <sub>12</sub> Na <sub>0</sub> -LTA     | 250                        | 272 | 368                      | 2494±68                     | 15       | 18      |



## 4. References

- (1) Baekelant, W.; Aghakhani, S.; Coutino-Gonzalez, E.; Kennes, K.; D'Acapito, F.; Grandjean, D.; Van Der Auweraer, M.; Lievens, P.; Roeffaers, M. B. J.; Hofkens, J.; Steele, J. A. Shaping the Optical Properties of Silver Clusters Inside Zeolite A via Guest-Host-Guest Interactions. *J. Phys. Chem. Lett.* **2018**, *9* (18), 5344–5350. <https://doi.org/10.1021/acs.jpcclett.8b01890>.
- (2) Baekelant, W.; Aghakhani, S.; Coutino-Gonzalez, E.; Grandjean, D.; Kennes, K.; Jonckheere, D.; Fron, E.; D'Acapito, F.; Longo, A.; Lievens, P.; Roeffaers, M. B. J.; Hofkens, J. Confinement of Highly Luminescent Lead Clusters in Zeolite A. *J. Phys. Chem. C* **2018**, *122* (25), 13953–13961. <https://doi.org/10.1021/acs.jpcc.8b01107>.
- (3) Fron, E.; Aghakhani, S.; Baekelant, W.; Grandjean, D.; Coutino-Gonzalez, E.; Van Der Auweraer, M.; Roeffaers, M. B. J.; Lievens, P.; Hofkens, J. Structural and Photophysical Characterization of Ag Clusters in LTA Zeolites. *J. Phys. Chem. C* **2019**, *123* (16), 10630–10638. <https://doi.org/10.1021/acs.jpcc.9b00204>.
